# Supplementary material for: Chemical Profiles and Identification of Key Compound Caffeine in Marine-Derived Traditional Chinese Medicine Ostreae concha
Source: PubMed Central journal article supplement (PMC3397450; doi:10.3390/md10051180), 2012-05-23

## Supplementary Materials

|                                                                          |     |
|--------------------------------------------------------------------------|-----|
| <b>Figure S1.</b> The positive BPI chromatogram of the sample A1 .....   | S3  |
| <b>Figure S2.</b> The negative BPI chromatogram of the sample A1 .....   | S3  |
| <b>Figure S3.</b> The positive BPI chromatogram of the sample A2 .....   | S4  |
| <b>Figure S4.</b> The negative BPI chromatogram of the sample A2.....    | S4  |
| <b>Figure S5.</b> The positive BPI chromatogram of the sample A3 .....   | S5  |
| <b>Figure S6.</b> The negative BPI chromatogram of the sampleA3 .....    | S5  |
| <b>Figure S7</b> The positive BPI chromatogram of the sample A4.....     | S6  |
| <b>Figure S8.</b> The negative BPI chromatogram of the sample A4 .....   | S6  |
| <b>Figure S9.</b> The positive BPI chromatogram of the sample A5 .....   | S7  |
| <b>Figure S10.</b> The negative BPI chromatogram of the sample A5 .....  | S7  |
| <b>Figure S11.</b> The positive BPI chromatogram of the sample A6 .....  | S8  |
| <b>Figure S12.</b> The negative BPI chromatogram of the sample A6 .....  | S8  |
| <b>Figure S13.</b> The positive BPI chromatogram of the sample A7 .....  | S9  |
| <b>Figure S14.</b> The negative BPI chromatogram of the sample A7 .....  | S9  |
| <b>Figure S15.</b> The positive BPI chromatogram of the sample A8 .....  | S10 |
| <b>Figure S16.</b> The negative BPI chromatogram of the sample A8 .....  | S10 |
| <b>Figure S17.</b> The positive BPI chromatogram of the sample A9 .....  | S11 |
| <b>Figure S18.</b> The negative BPI chromatogram of the sample A9 .....  | S11 |
| <b>Figure S19.</b> The positive BPI chromatogram of the sample A10.....  | S12 |
| <b>Figure S20.</b> The negative BPI chromatogram of the sample A10 ..... | S12 |
| <b>Figure S21.</b> The negative BPI chromatogram of the sample A11 ..... | S13 |
| <b>Figure S22.</b> The positive BPI chromatogram of the sample A12 ..... | S13 |
| <b>Figure S23.</b> The negative BPI chromatogram of the sample A12 ..... | S14 |
| <b>Figure S24.</b> The positive BPI chromatogram of the sample B1 .....  | S14 |
| <b>Figure S25.</b> The negative BPI chromatogram of the sample B1 .....  | S15 |
| <b>Figure S26.</b> The positive BPI chromatogram of the sample B2 .....  | S15 |
| <b>Figure S27.</b> The negative BPI chromatogram of the sample B2 .....  | S16 |
| <b>Figure S28.</b> The positive BPI chromatogram of the sample B3 .....  | S16 |
| <b>Figure S29.</b> The negative BPI chromatogram of the sample B3 .....  | S17 |
| <b>Figure S30.</b> The positive BPI chromatogram of the sample B4 .....  | S17 |
| <b>Figure S31.</b> The negative BPI chromatogram of the sample B4 .....  | S18 |
| <b>Figure S32.</b> The positive BPI chromatogram of the sample B5 .....  | S18 |
| <b>Figure S33.</b> The negative BPI chromatogram of the sample B5 .....  | S19 |
| <b>Figure S34.</b> The positive BPI chromatogram of the sample B6 .....  | S19 |
| <b>Figure S35.</b> The negative BPI chromatogram of the sample B6 .....  | S20 |
| <b>Figure S36.</b> The positive BPI chromatogram of the sample B7 .....  | S20 |
| <b>Figure S37.</b> The negative BPI chromatogram of the sample B7 .....  | S21 |
| <b>Figure S38.</b> The positive BPI chromatogram of the sample B8 .....  | S21 |
| <b>Figure S39.</b> The negative BPI chromatogram of the sample B8 .....  | S22 |
| <b>Figure S40.</b> The positive BPI chromatogram of the sample B9 .....  | S22 |
| <b>Figure S41.</b> The negative BPI chromatogram of the sample B9.....   | S23 |

|                                                                                                      |     |
|------------------------------------------------------------------------------------------------------|-----|
| <b>Figure S42.</b> The positive BPI chromatogram of the sample B10 .....                             | S23 |
| <b>Figure S43.</b> The negative BPI chromatogram of the sample B10 .....                             | S24 |
| <b>Figure S44.</b> The positive BPI chromatogram of the sample B11 .....                             | S24 |
| <b>Figure S45.</b> The negative BPI chromatogram of the sample B11 .....                             | S25 |
| <b>Figure S46.</b> The positive BPI chromatogram of the sample B12 .....                             | S25 |
| <b>Figure S47.</b> The negative BPI chromatogram of the sample B12 .....                             | S26 |
| <b>Figure S48.</b> The OPLS-DA score plot in positive ion mode.....                                  | S26 |
| <b>Figure S49.</b> The $^1\text{H}$ -NMR spectrum of compound <b>1</b> in $\text{DMSO-}d_6$ .....    | S27 |
| <b>Figure S50.</b> The $^{13}\text{C}$ -NMR spectrum of compound <b>1</b> in $\text{DMSO-}d_6$ ..... | S28 |
| <b>Figure S51.</b> The HMQC spectrum of compound <b>1</b> in $\text{DMSO-}d_6$ .....                 | S29 |
| <b>Figure S52.</b> The HMBC spectrum of compound <b>1</b> in $\text{DMSO-}d_6$ .....                 | S30 |

**Figure S1.** The positive BPI chromatogram of the sample A1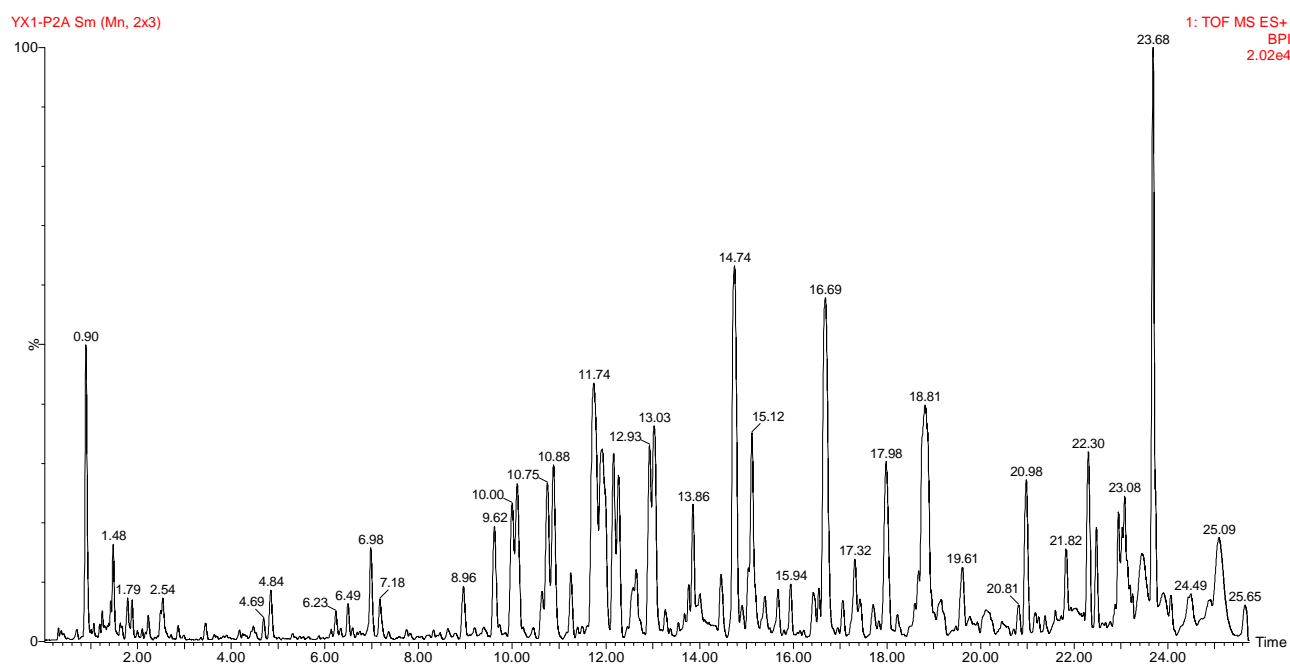**Figure S2.** The negative BPI chromatogram of the sample A1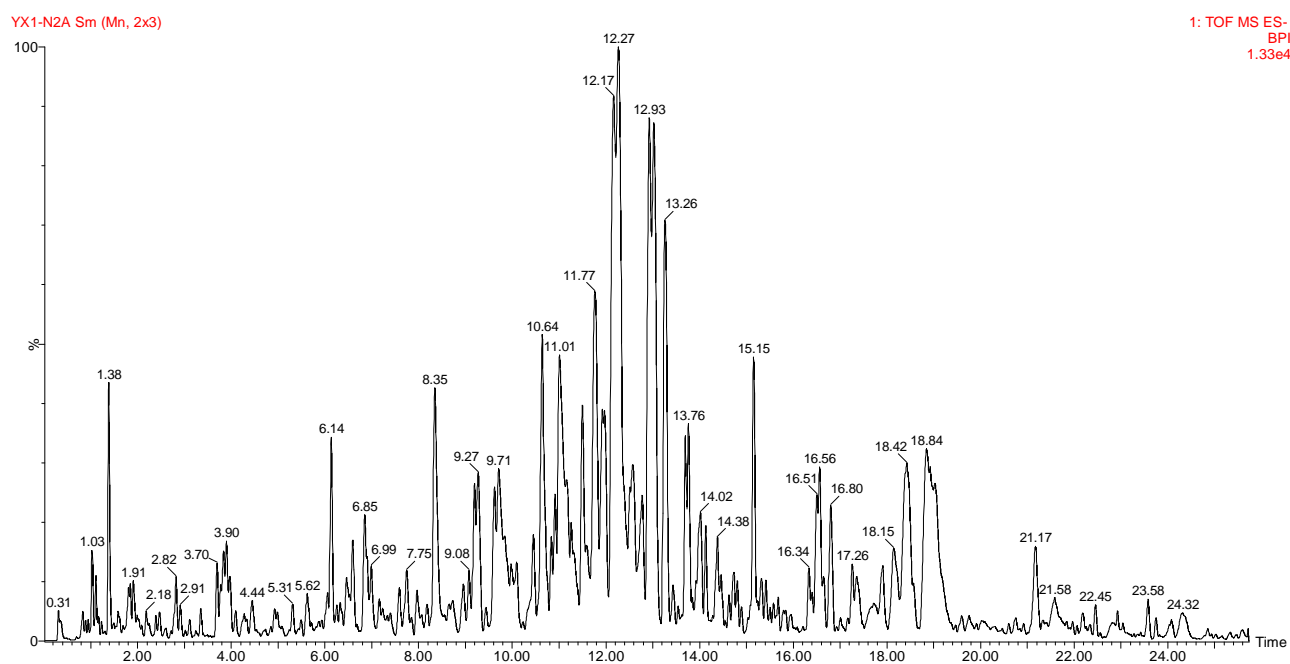

**Figure S3.** The positive BPI chromatogram of the sample A2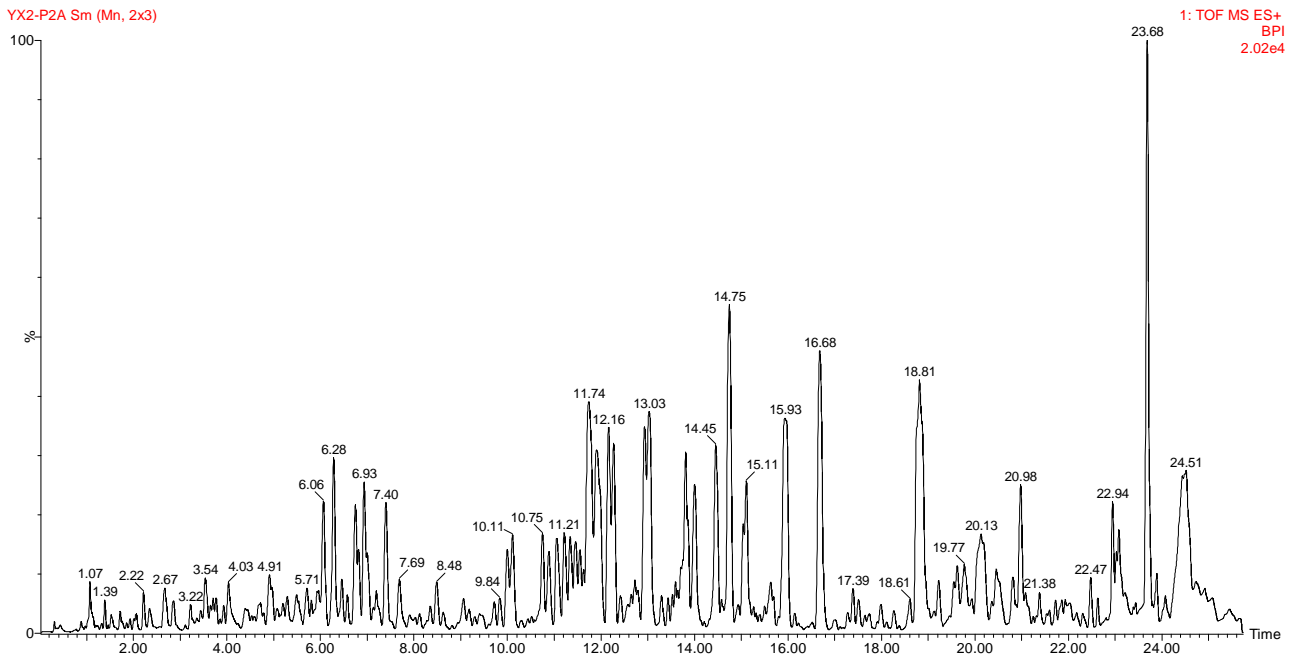**Figure S4.** The negative BPI chromatogram of the sample A2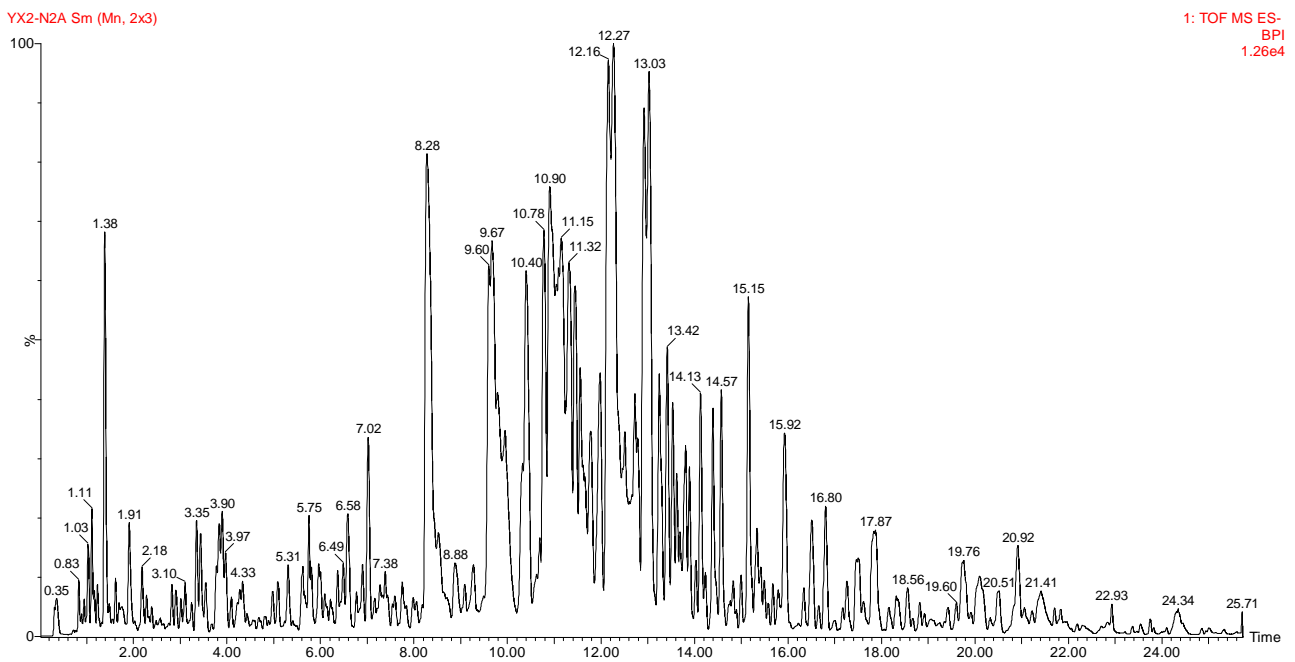

Figure S5. The positive BPI chromatogram of the sample A3

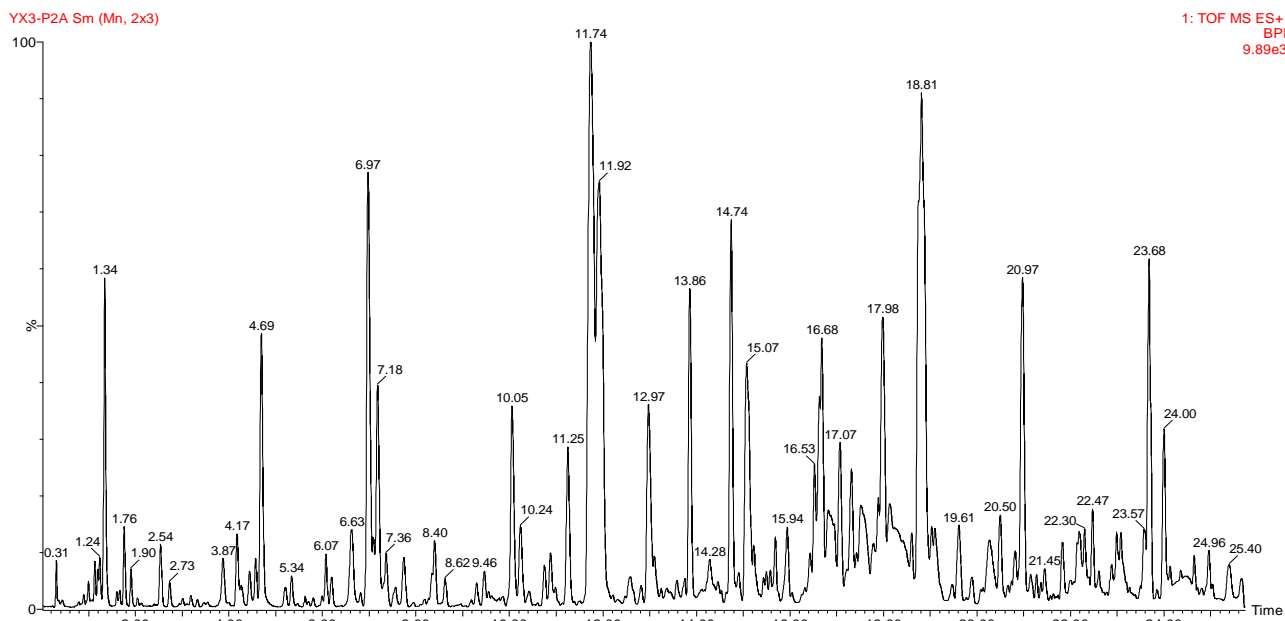

Figure S6. The negative BPI chromatogram of the sample A3

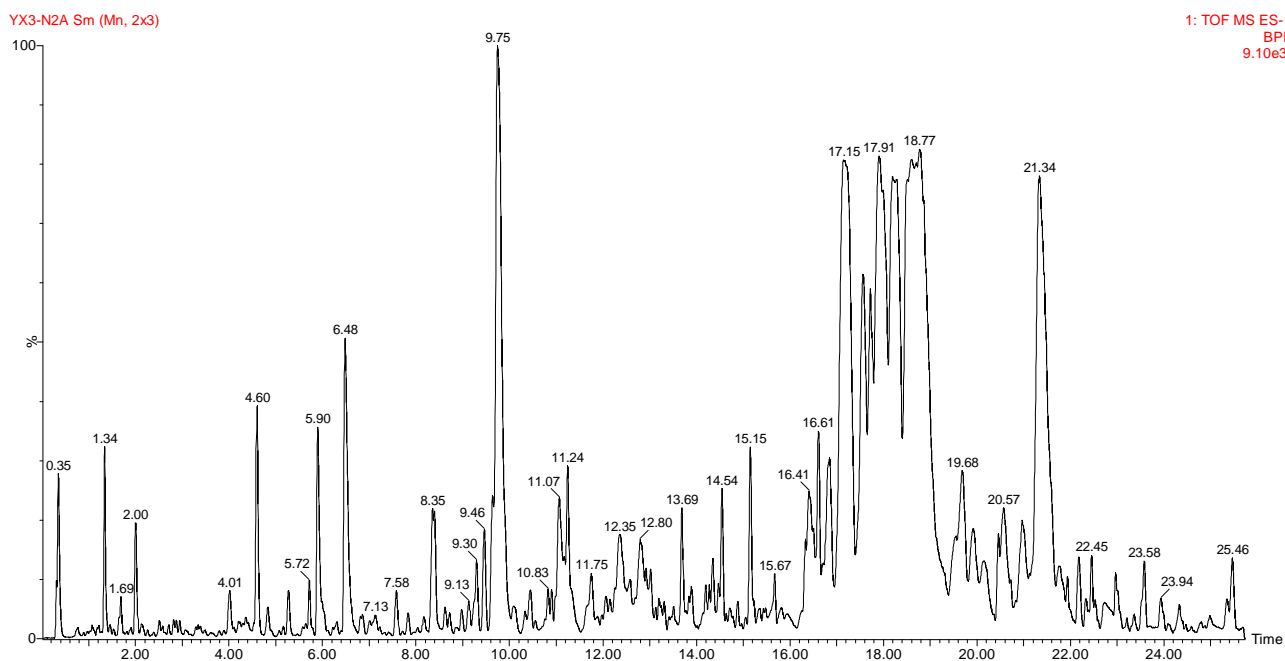

Figure S7 The positive BPI chromatogram of the sample A4

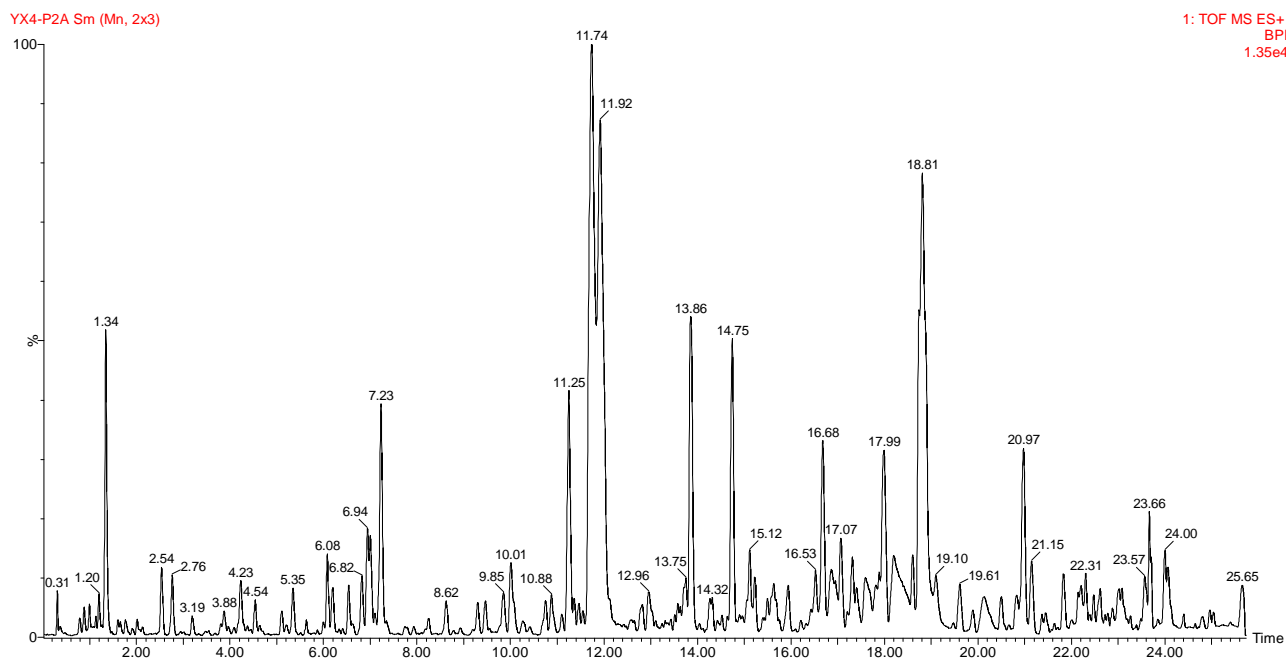

Figure S8. The negative BPI chromatogram of the sample A4

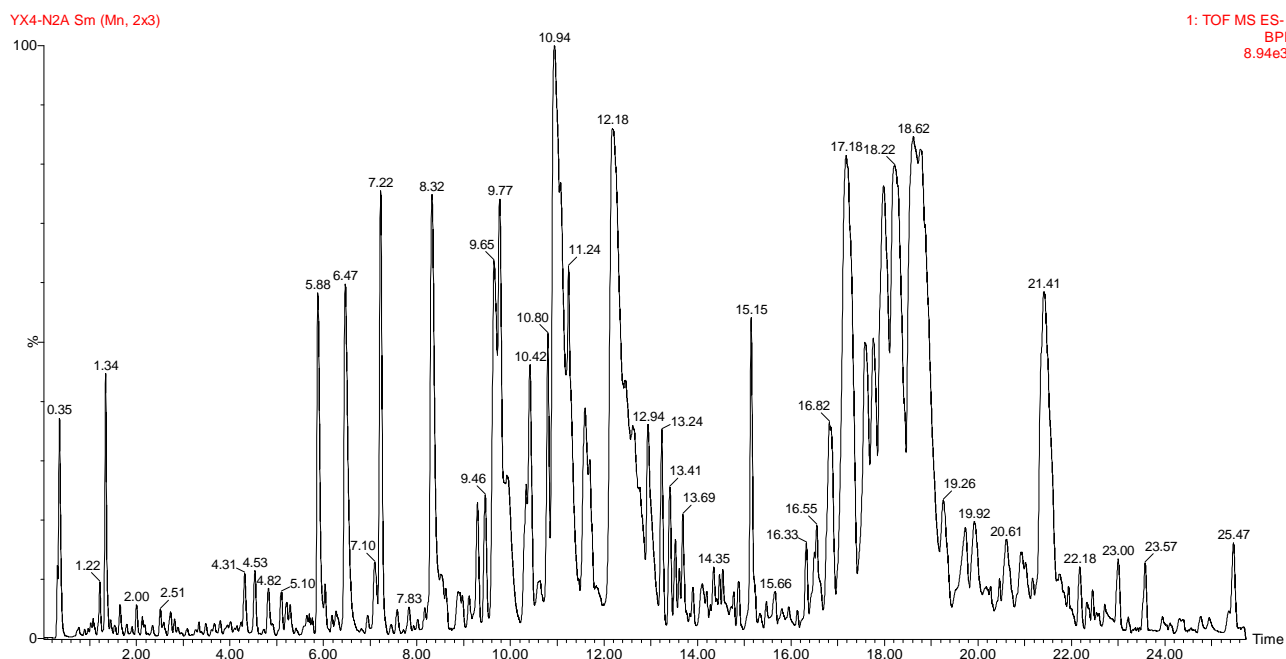

**Figure S9.** The positive BPI chromatogram of the sample A5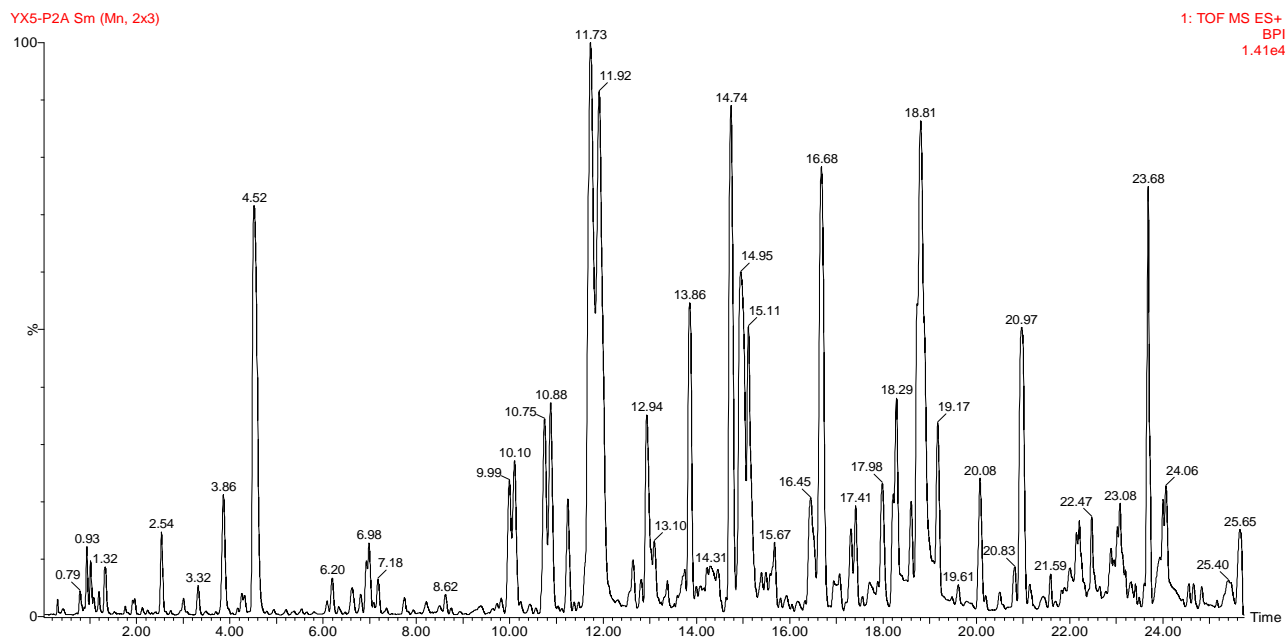**Figure S10.** The negative BPI chromatogram of the sample A5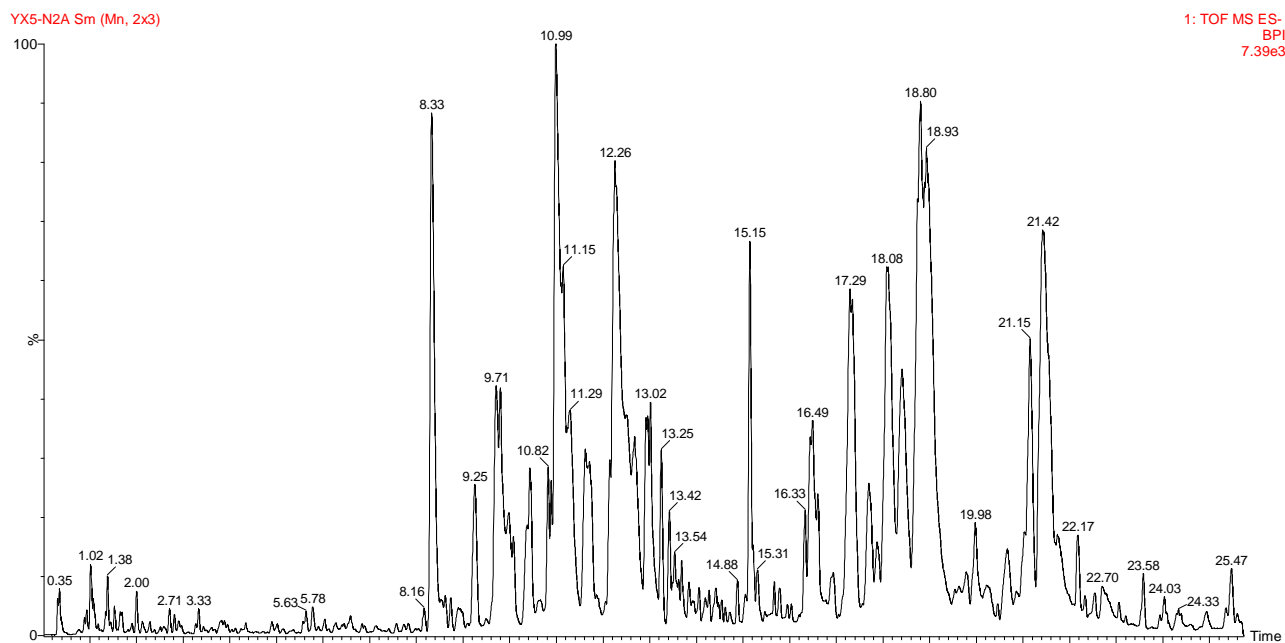

**Figure S11.** The positive BPI chromatogram of the sample A6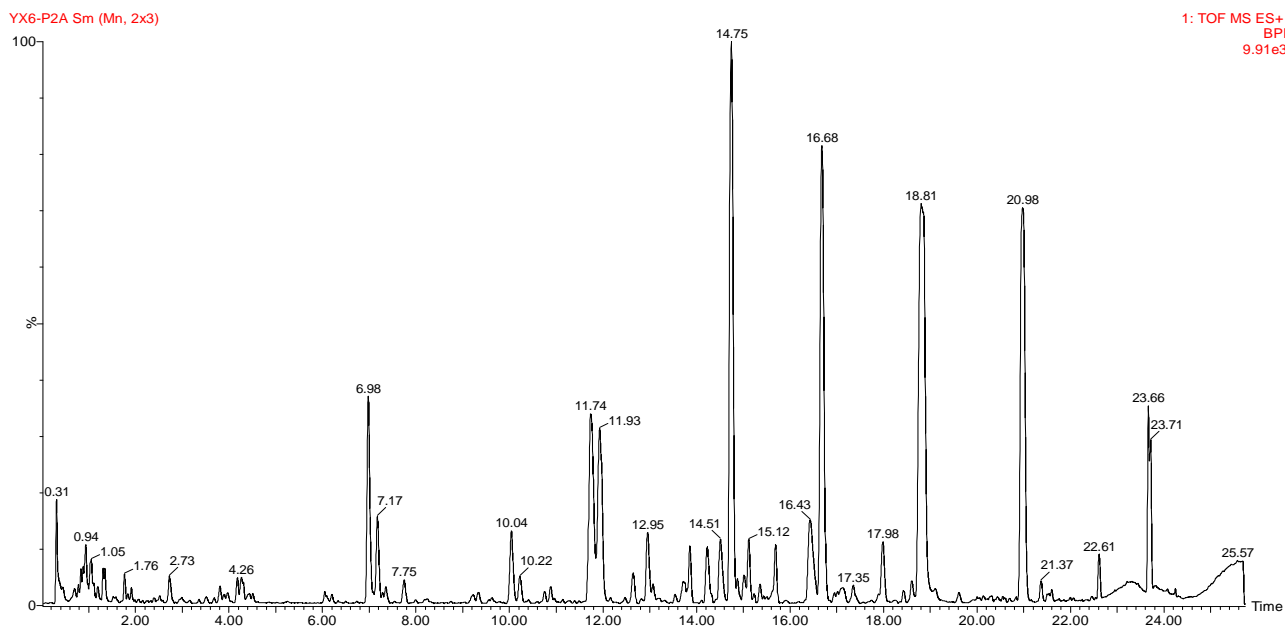**Figure S12.** The negative BPI chromatogram of the sample A6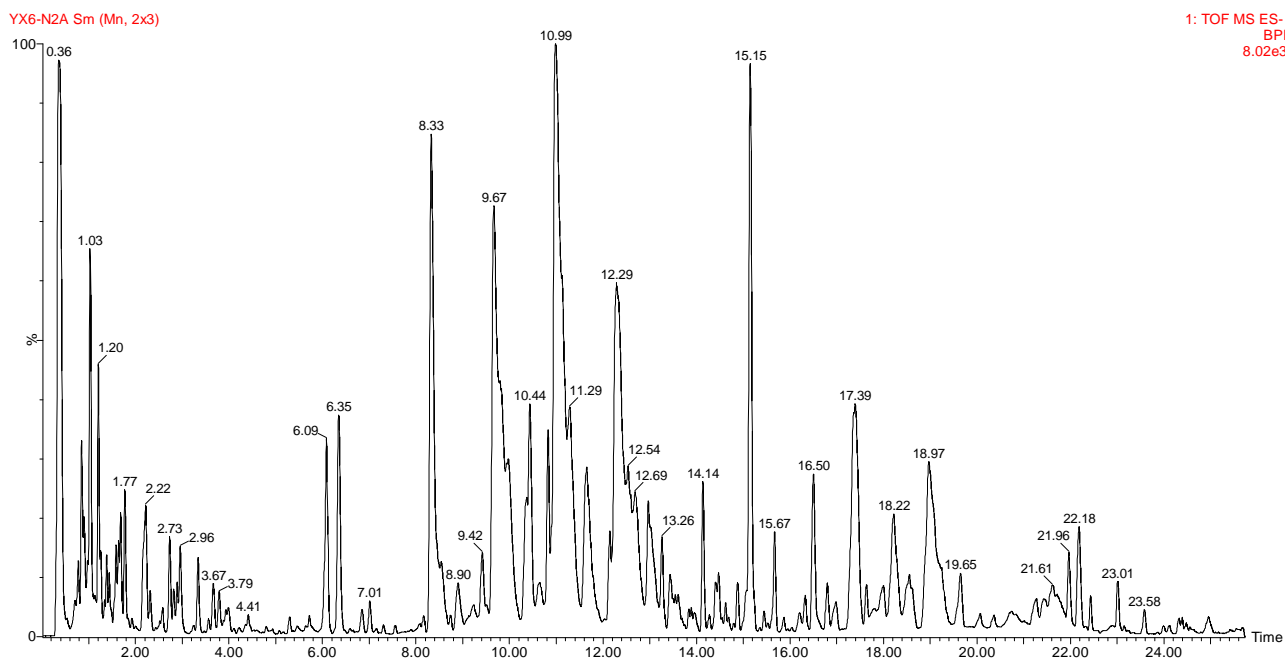



Figure S13. The positive BPI chromatogram of the sample A7

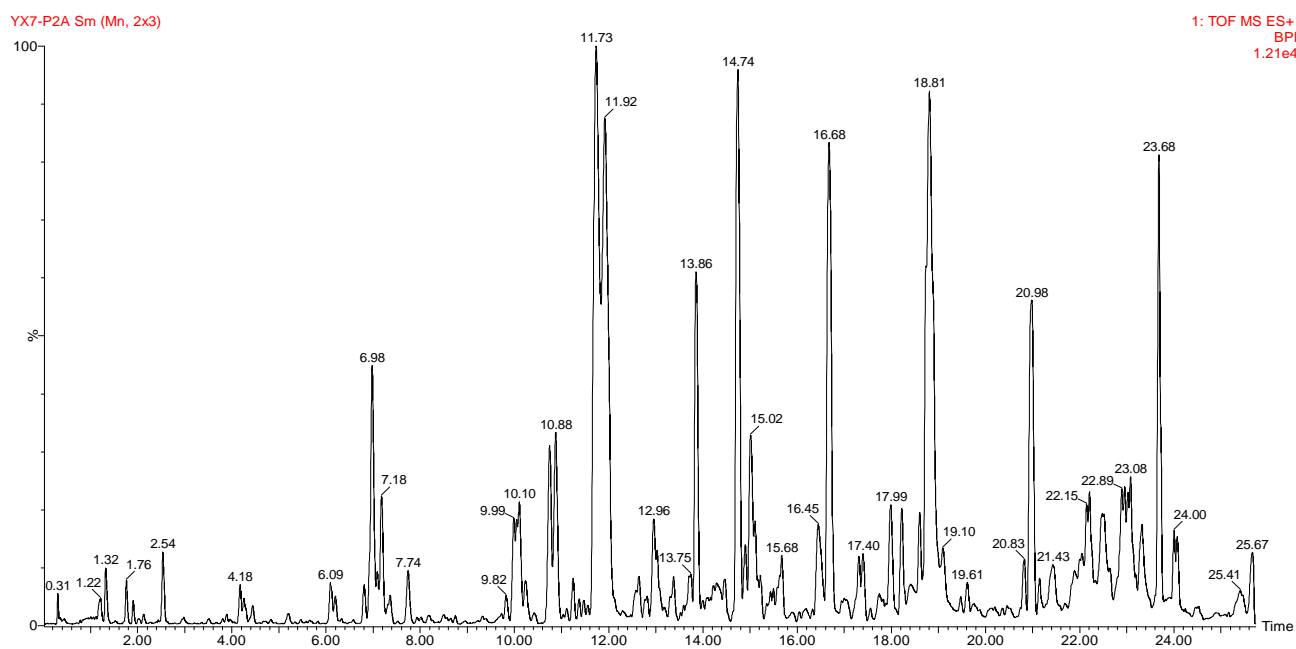

Figure S14. The negative BPI chromatogram of the sample A7

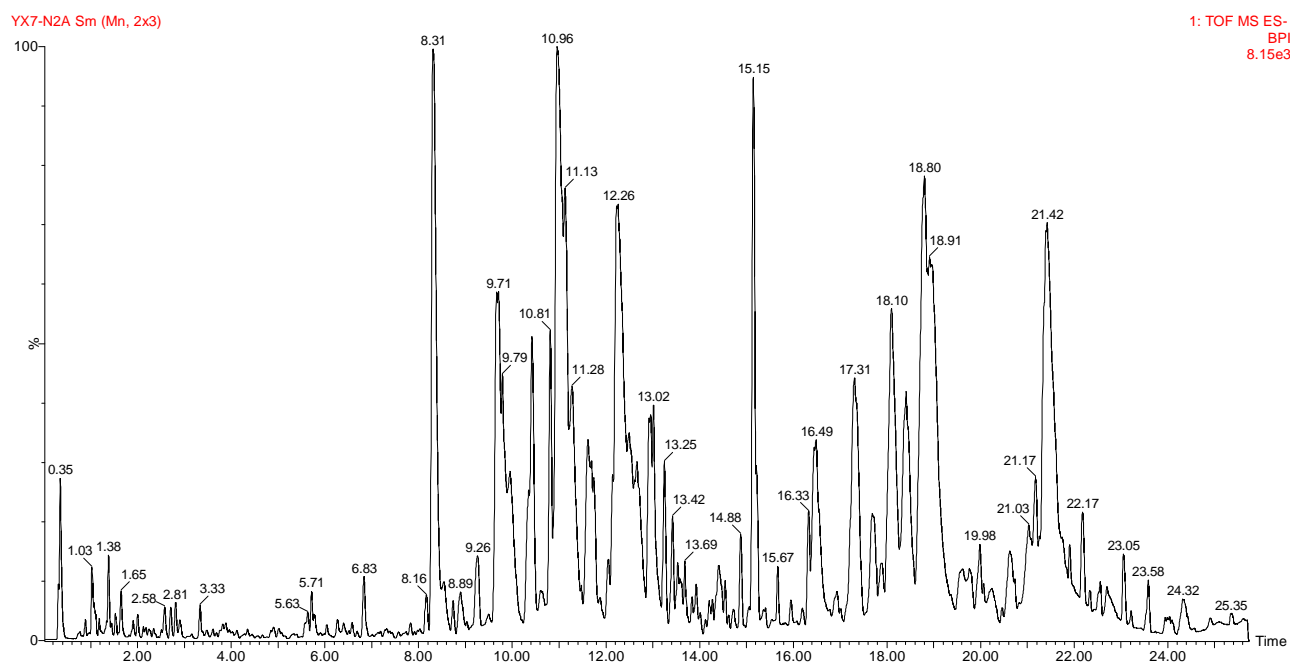

Figure S15. The positive BPI chromatogram of the sample A8

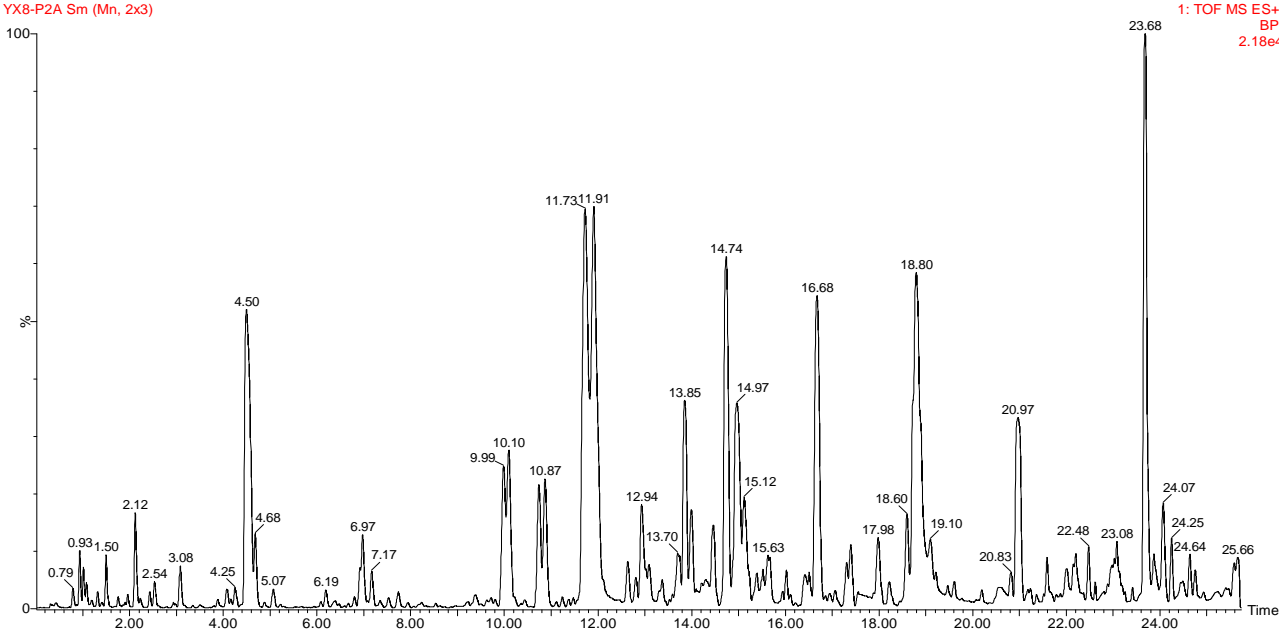

Figure S16. The negative BPI chromatogram of the sample A8

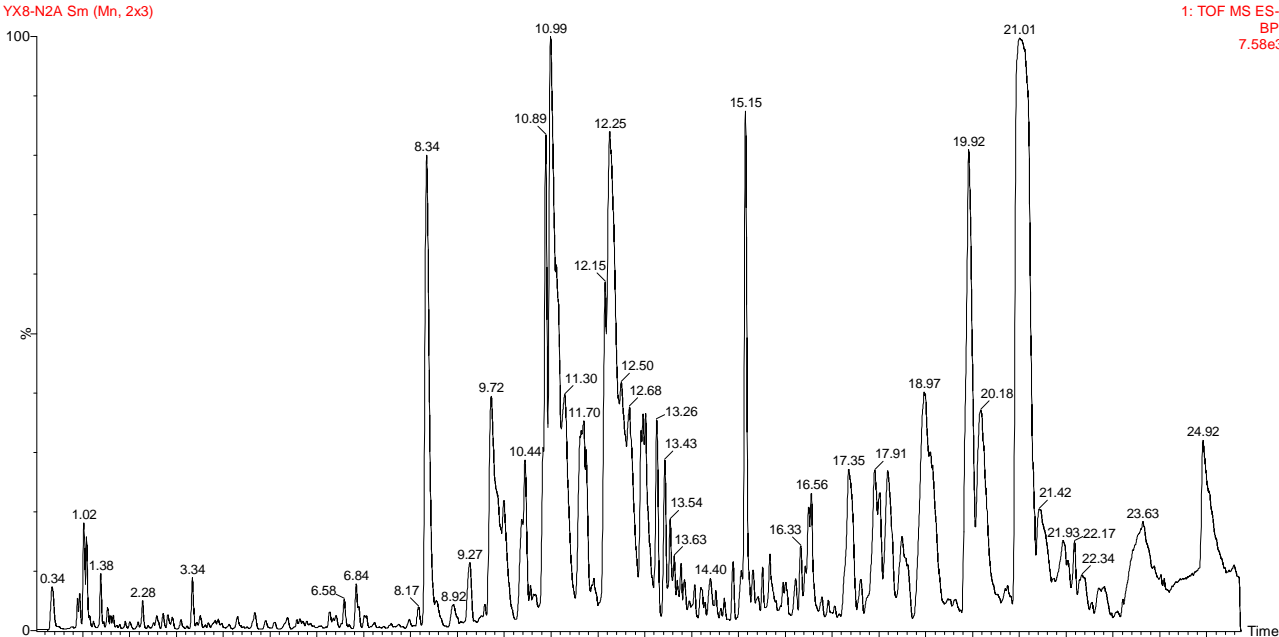

Figure S17. The positive BPI chromatogram of the sample A9

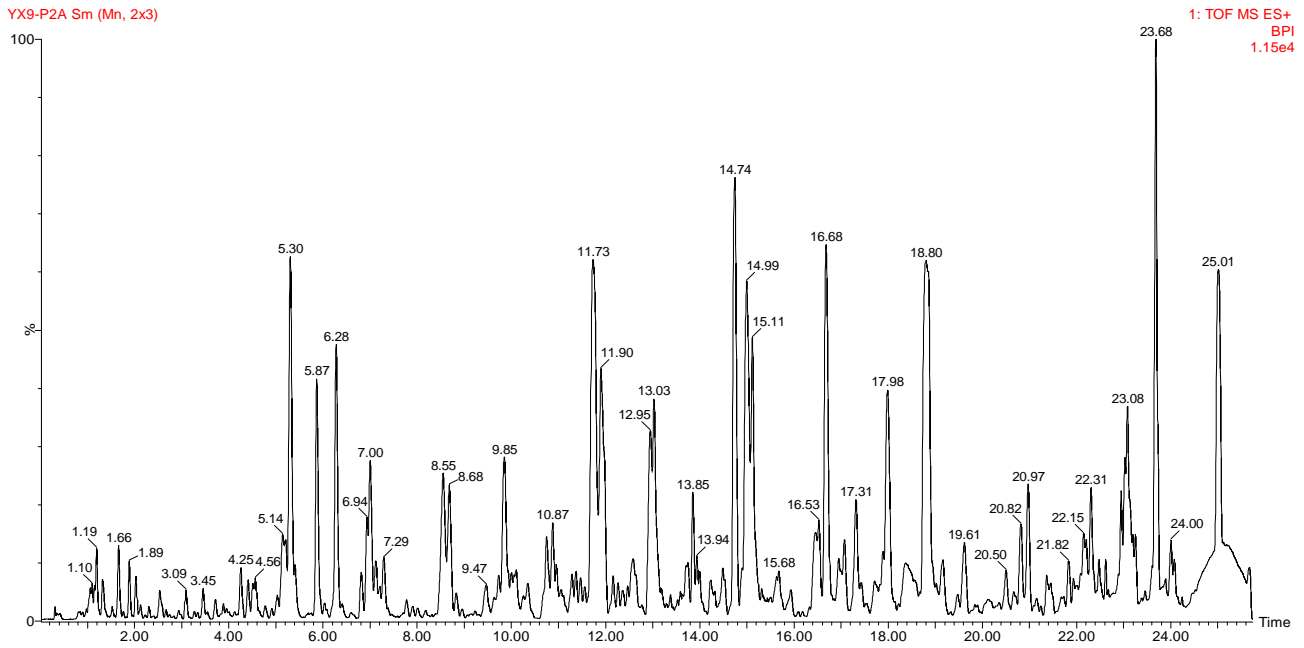

Figure S18. The negative BPI chromatogram of the sample A9

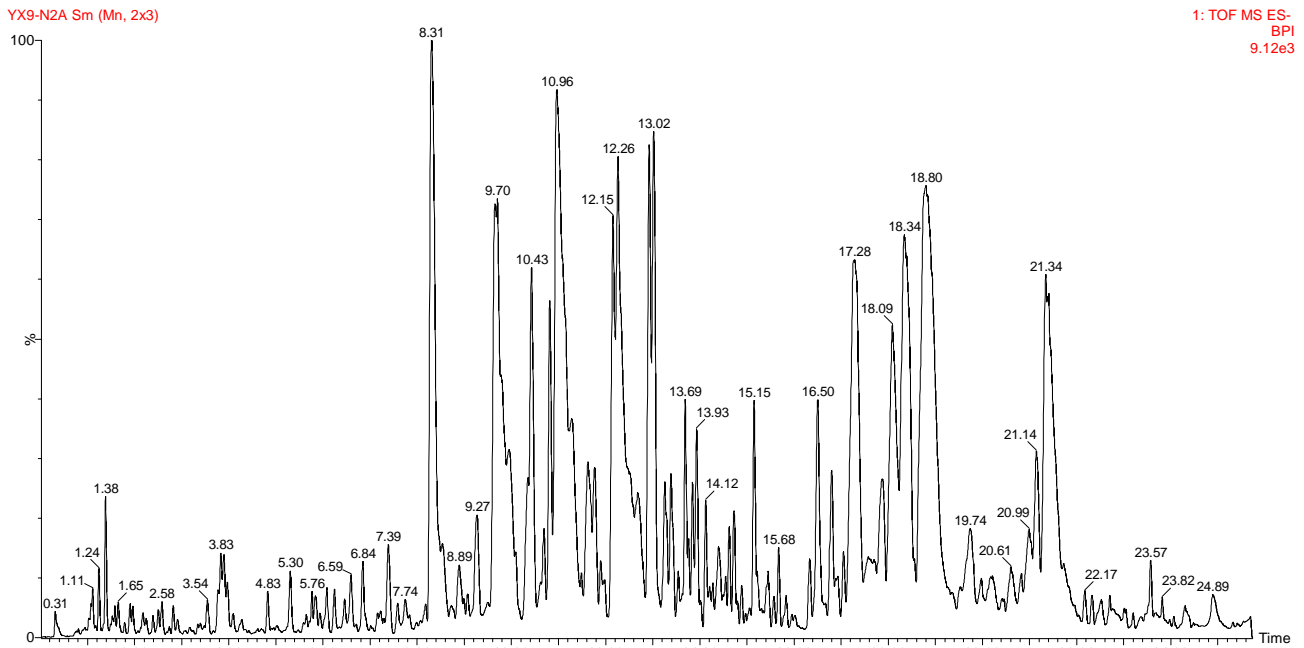

Figure S19. The positive BPI chromatogram of the sample A10

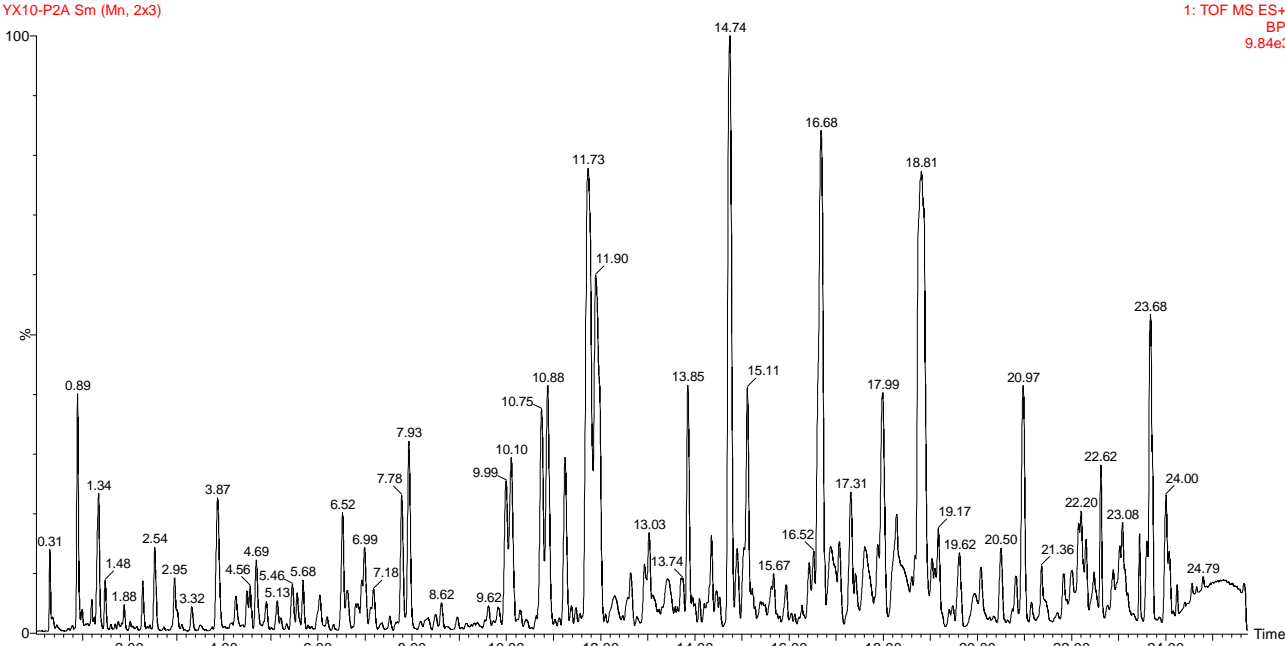

Figure S20. The negative BPI chromatogram of the sample A10

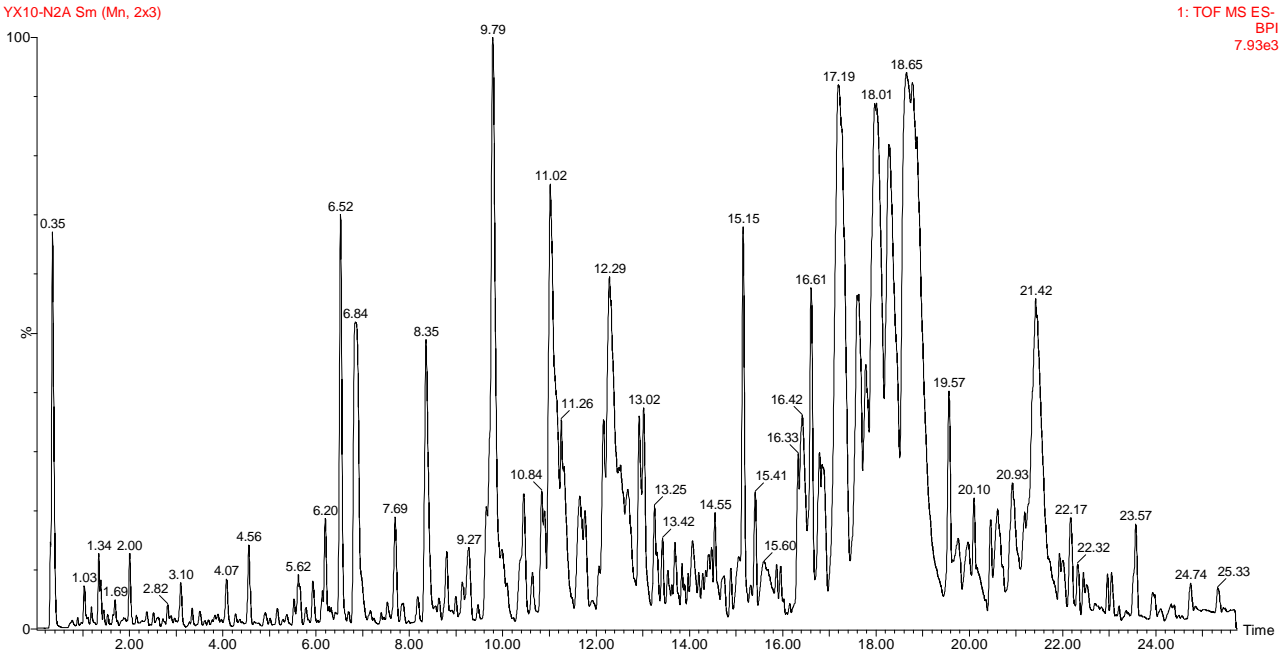

Figure S21. The negative BPI chromatogram of the sample A11

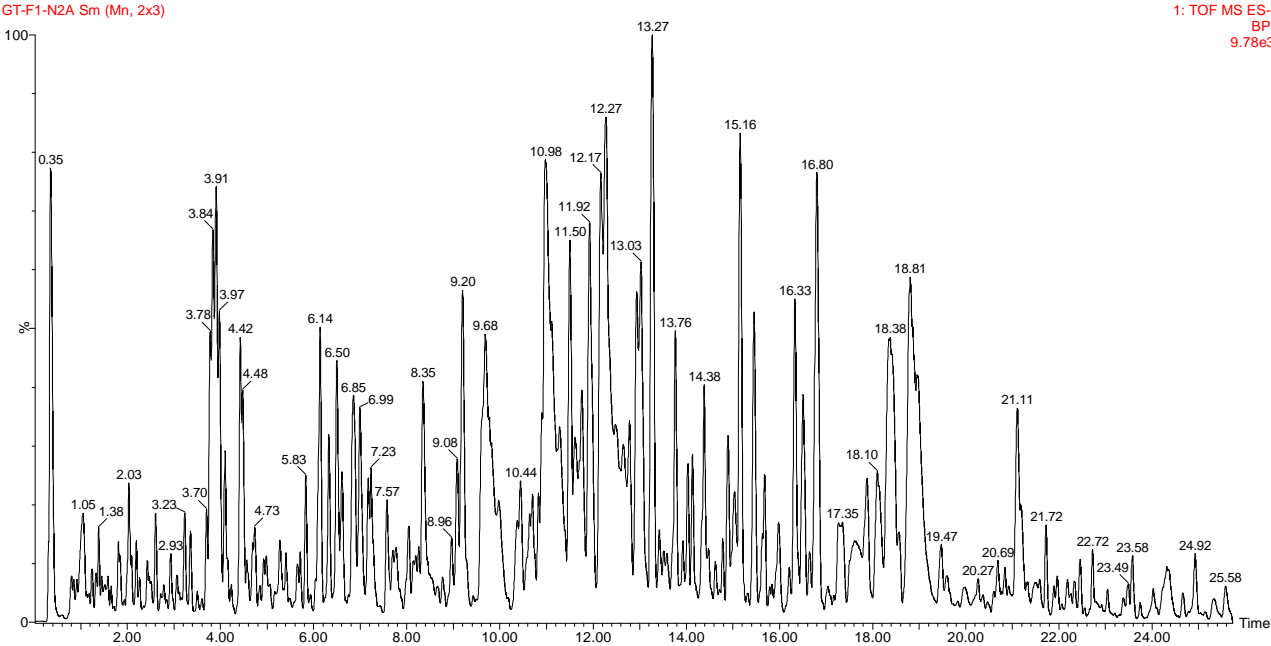

Figure S22. The positive BPI chromatogram of the sample A12

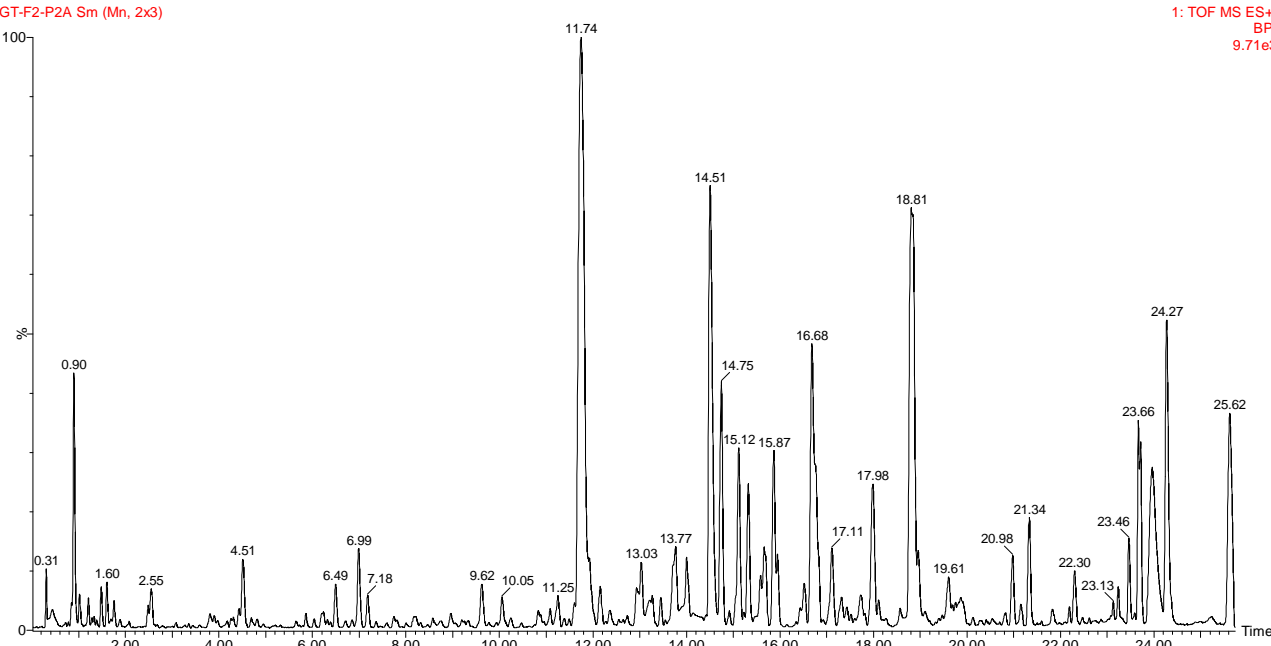

Figure S23. The negative BPI chromatogram of the sample A12

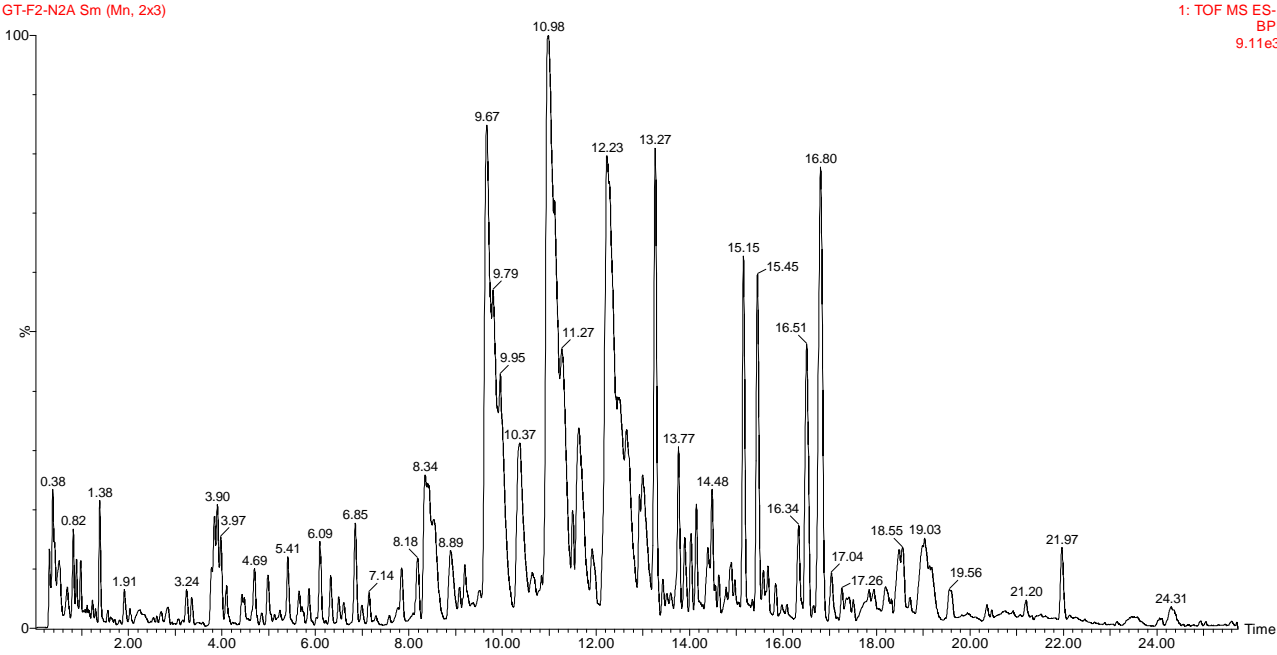

Figure S24. The positive BPI chromatogram of the sample B1

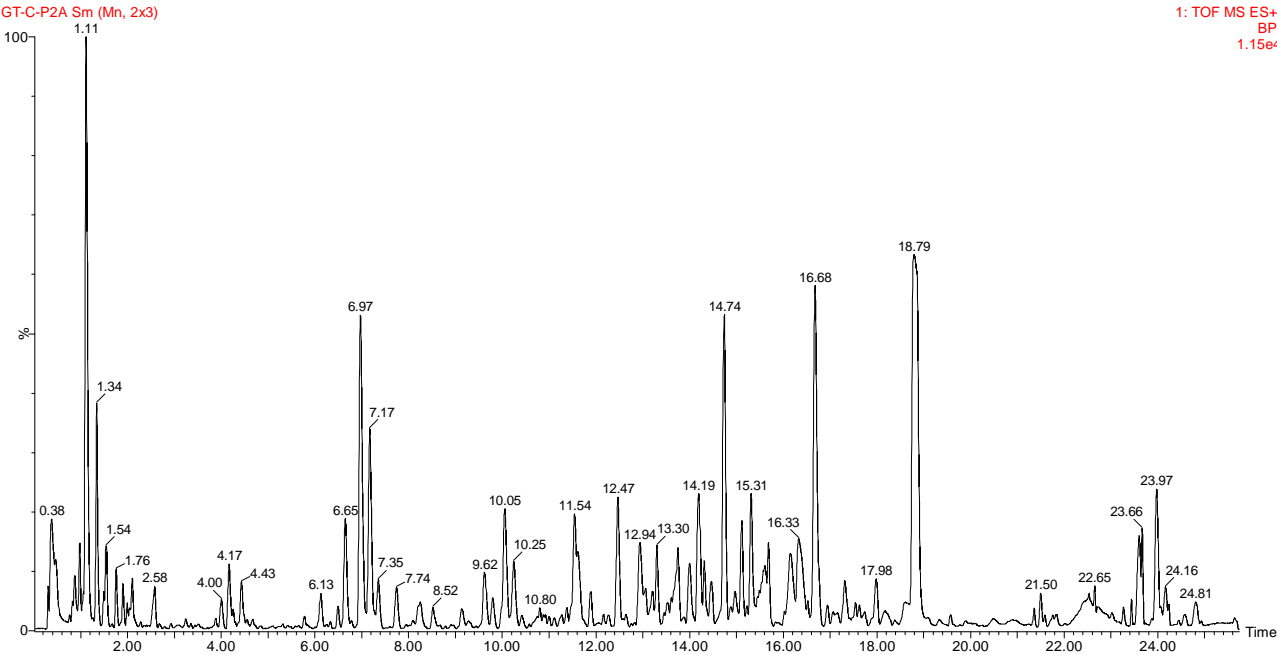

Figure S25. The negative BPI chromatogram of the sample B1

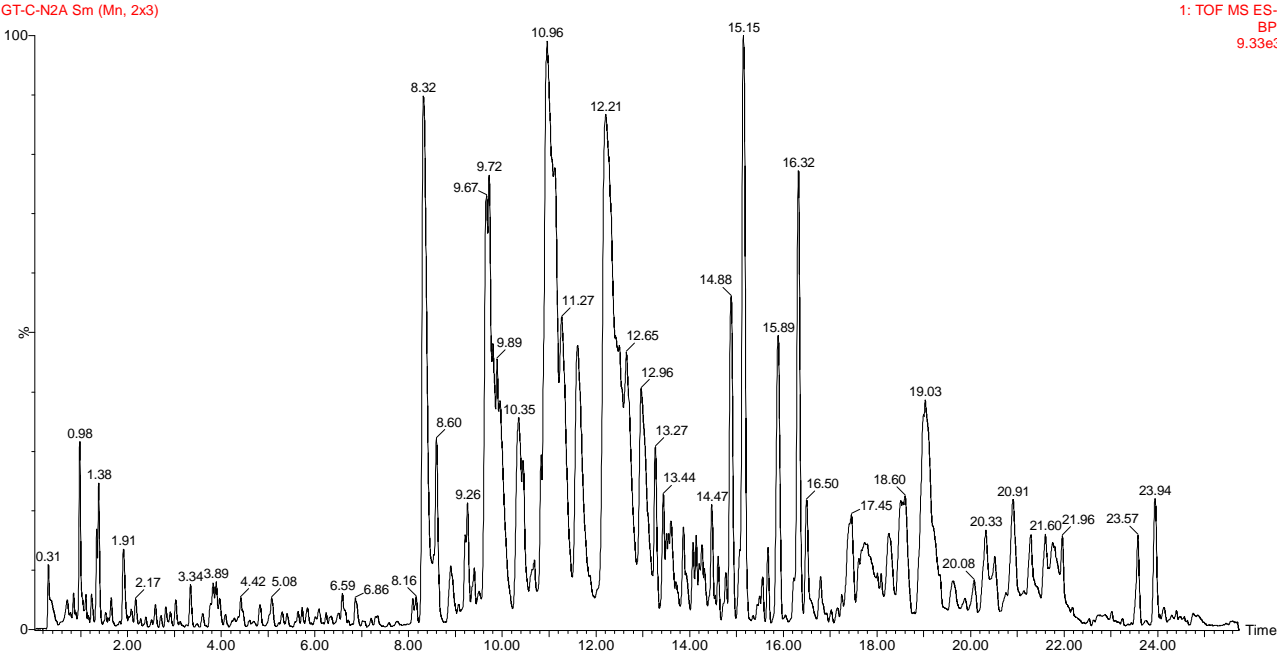

Figure S26. The positive BPI chromatogram of the sample B2

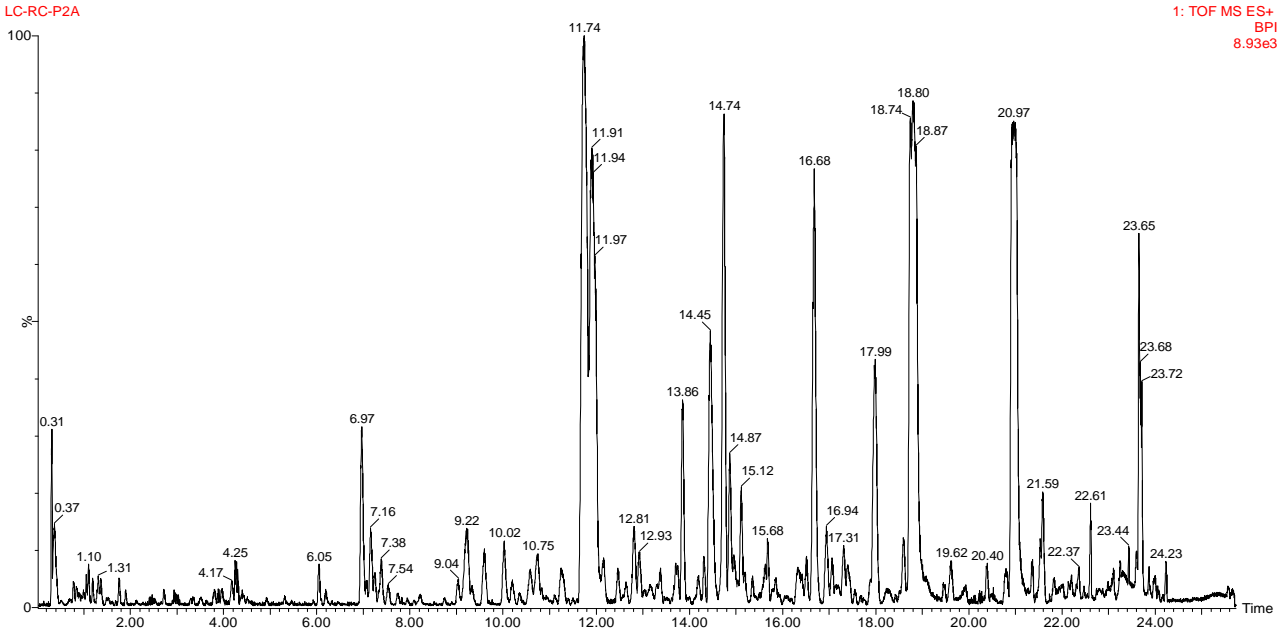

**Figure S27.** The negative BPI chromatogram of the sample B2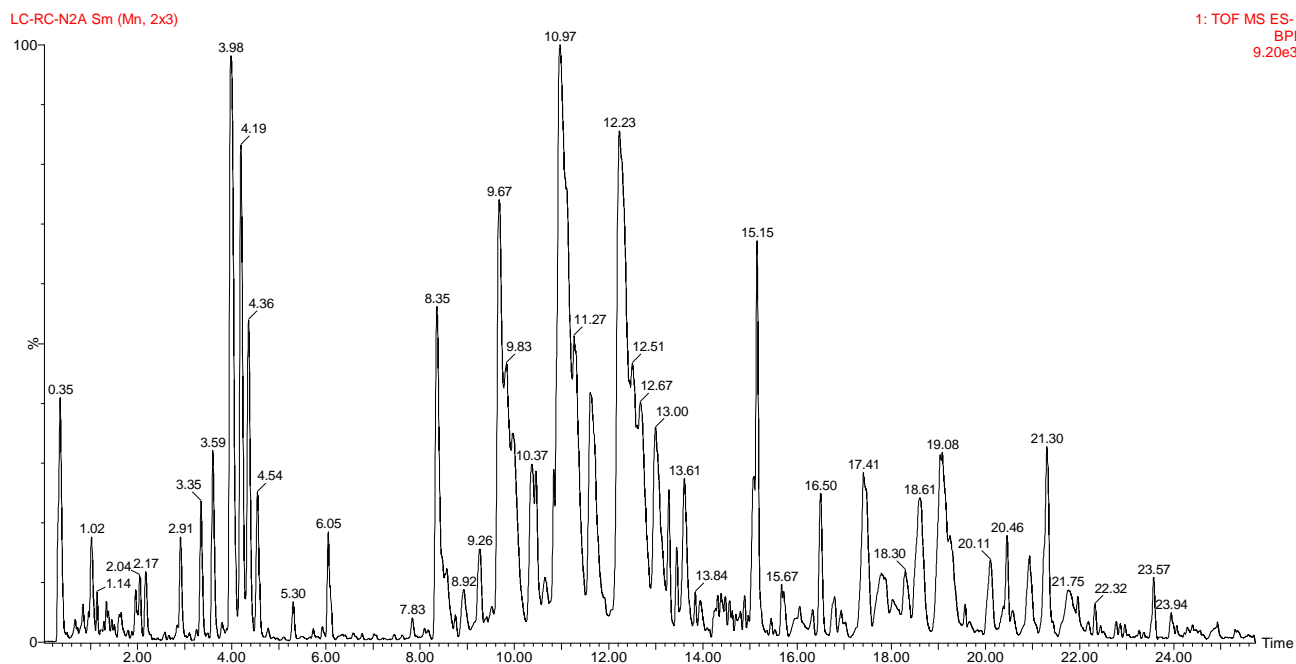**Figure S28.** The positive BPI chromatogram of the sample B3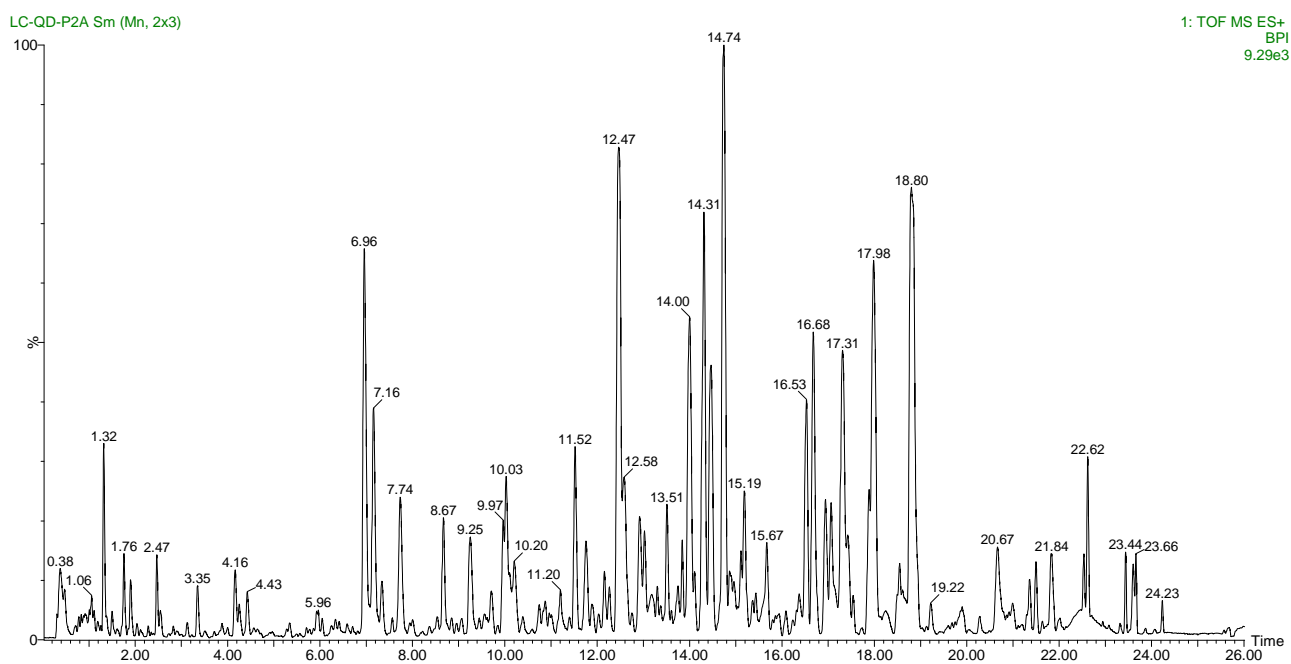



Figure S29. The negative BPI chromatogram of the sample B3

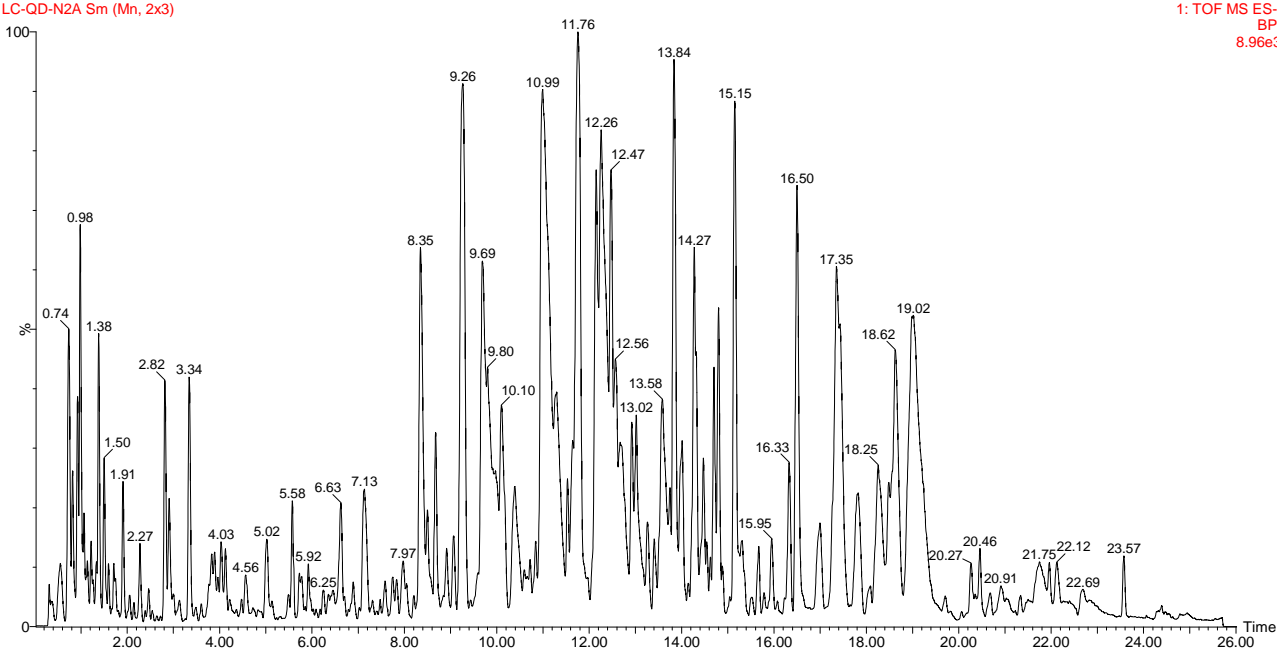

Figure S30. The positive BPI chromatogram of the sample B4

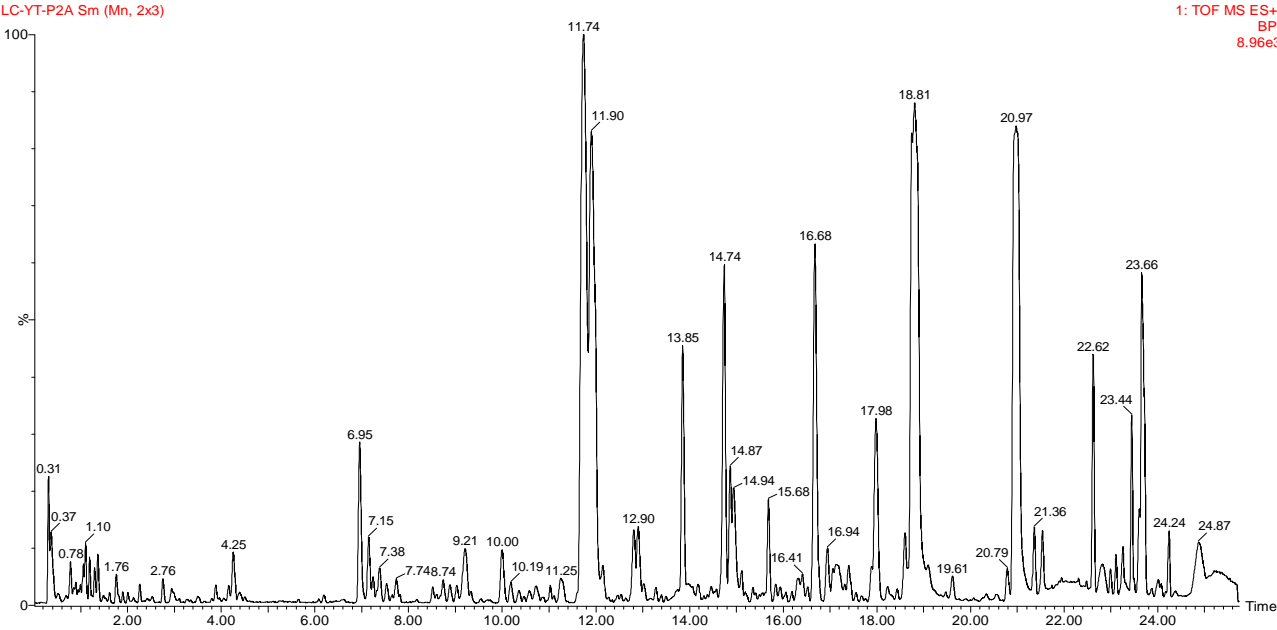

Figure S31. The negative BPI chromatogram of the sample B4

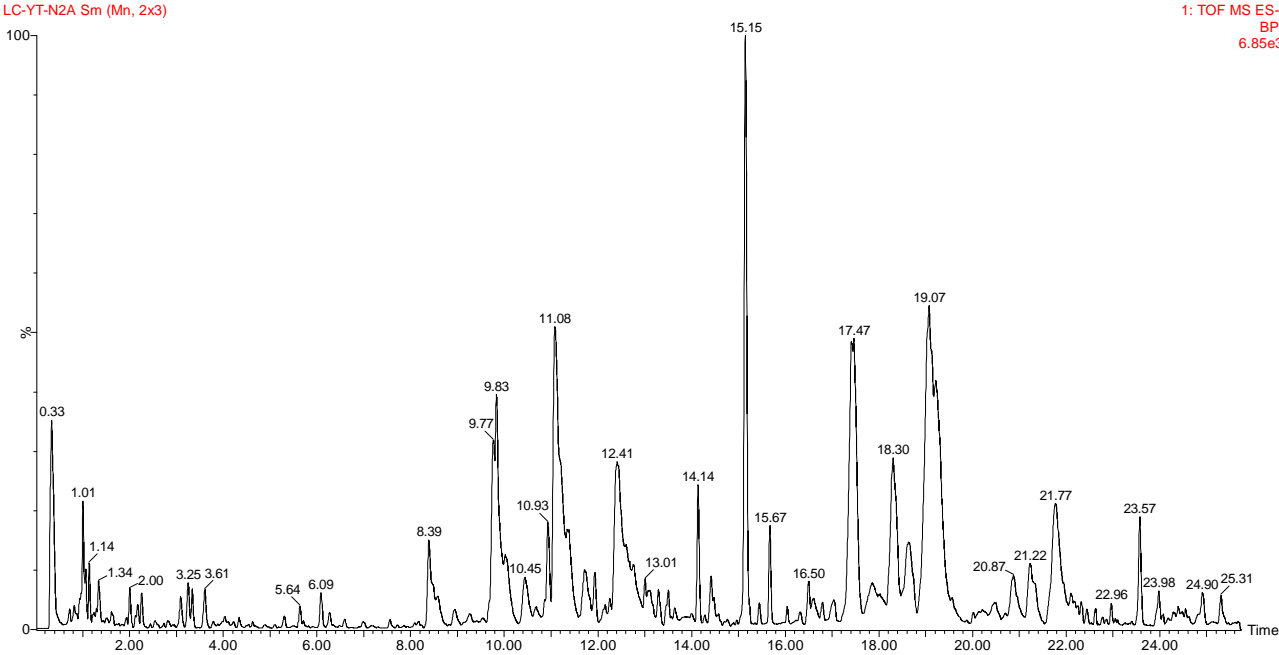

Figure S32. The positive BPI chromatogram of the sample B5

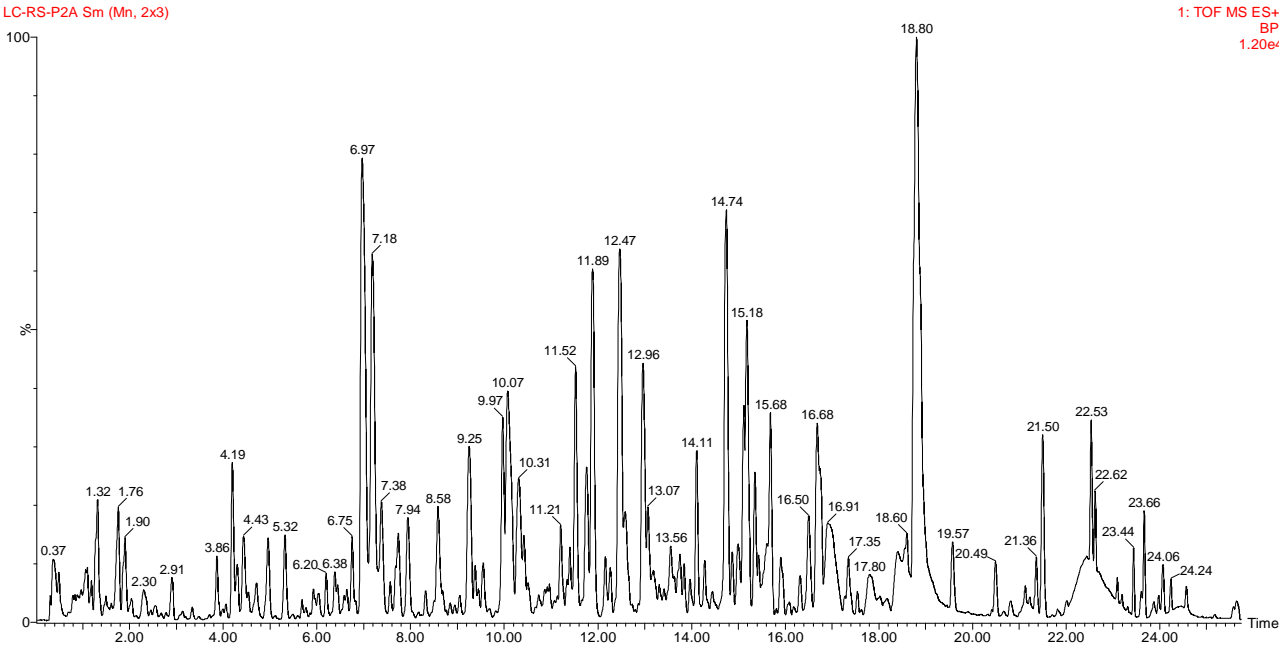

Figure S33. The negative BPI chromatogram of the sample B5

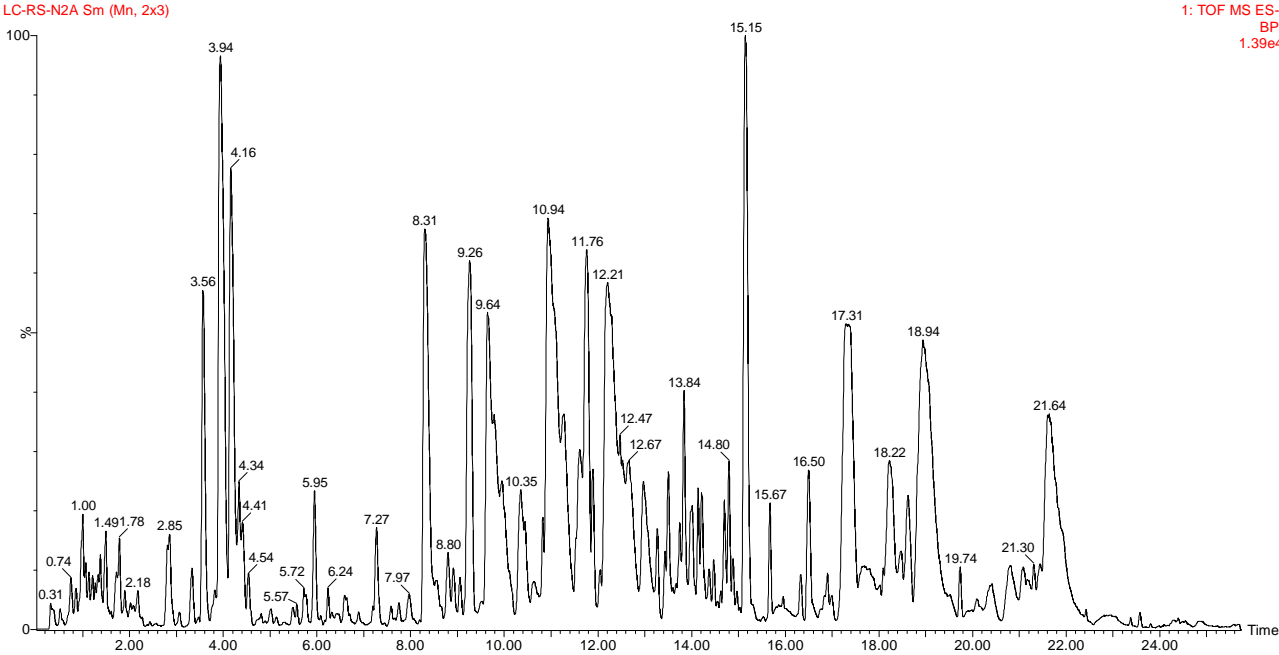

Figure S34. The positive BPI chromatogram of the sample B6

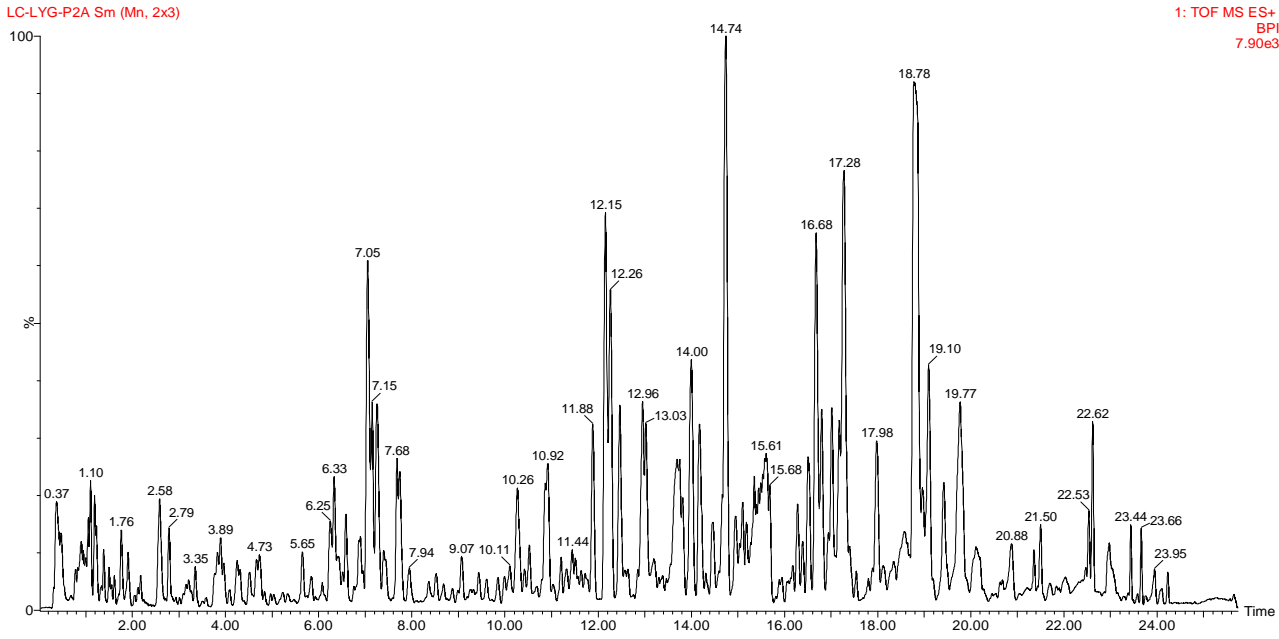

Figure S35. The negative BPI chromatogram of the sample B6

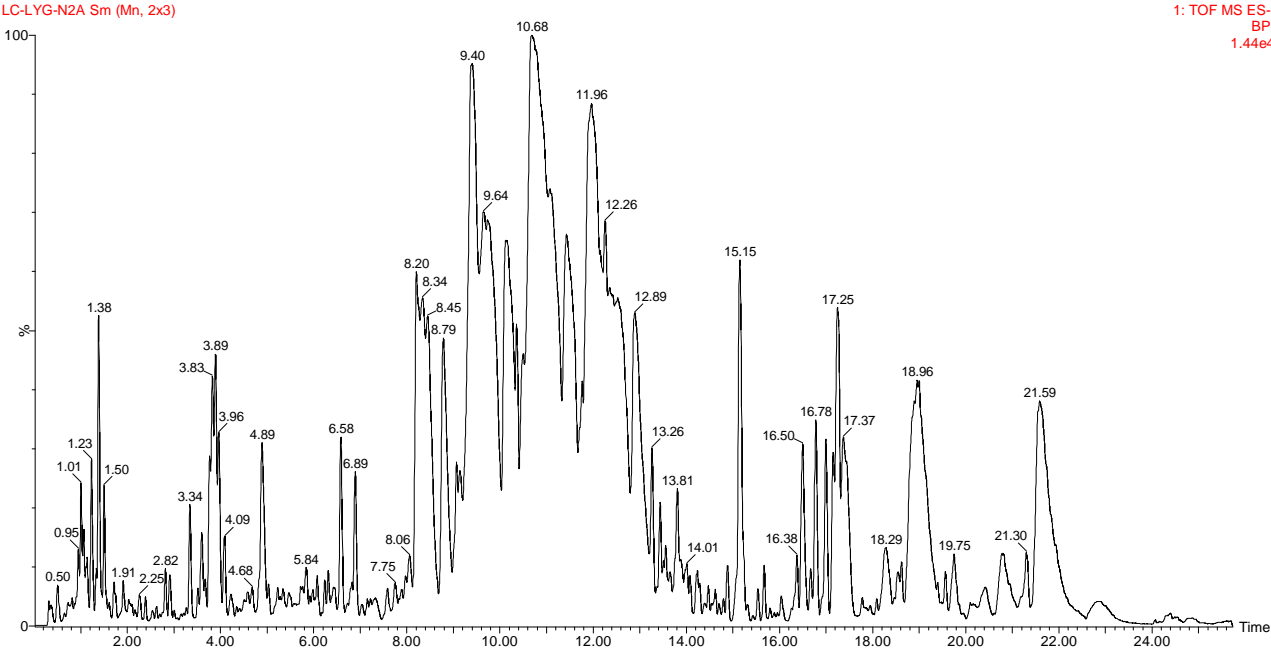

Figure S36. The positive BPI chromatogram of the sample B7

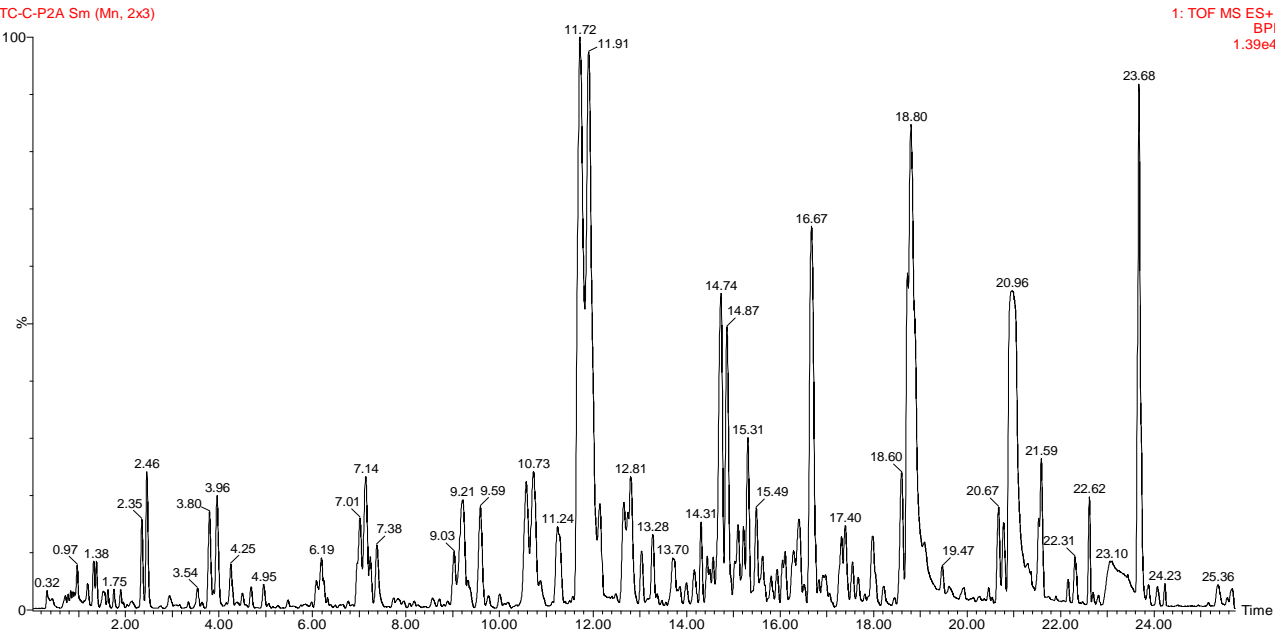

Figure S37. The negative BPI chromatogram of the sample B7

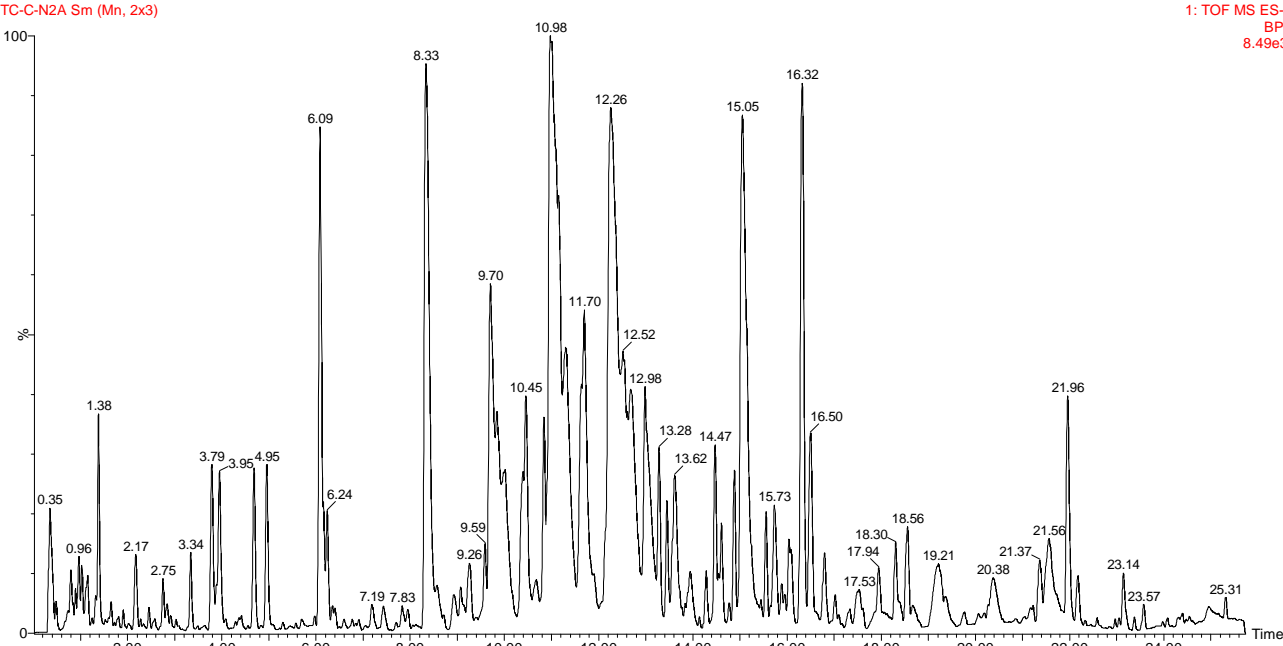

Figure S38. The positive BPI chromatogram of the sample B8

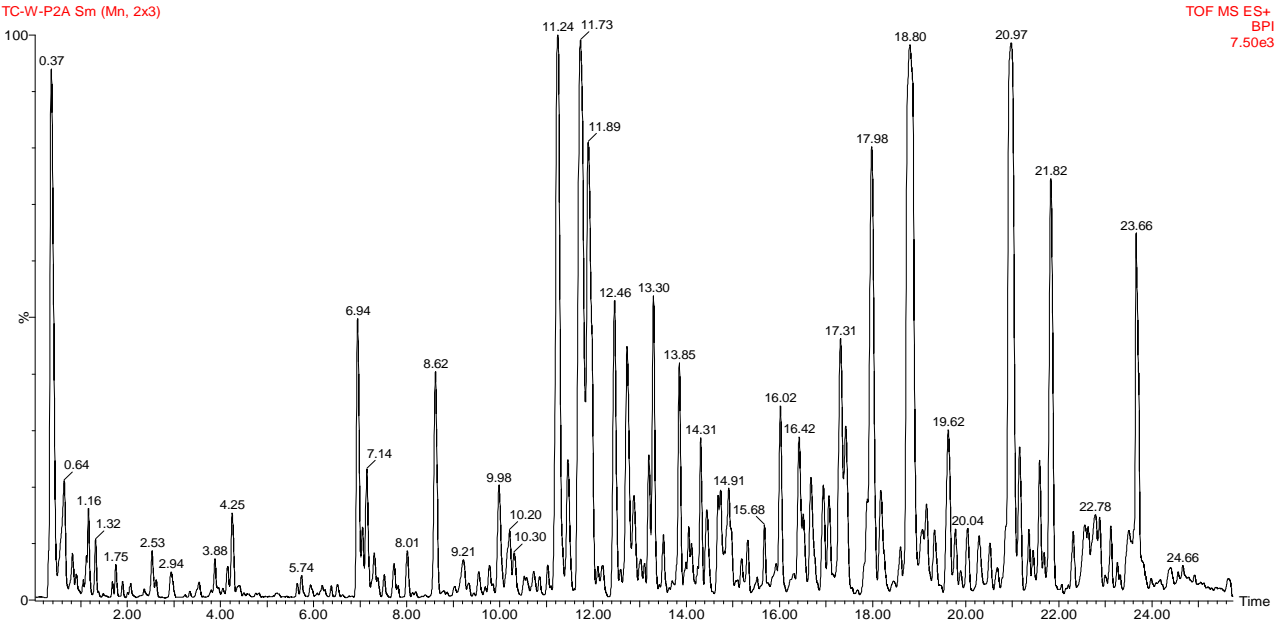

Figure S39. The negative BPI chromatogram of the sample B8

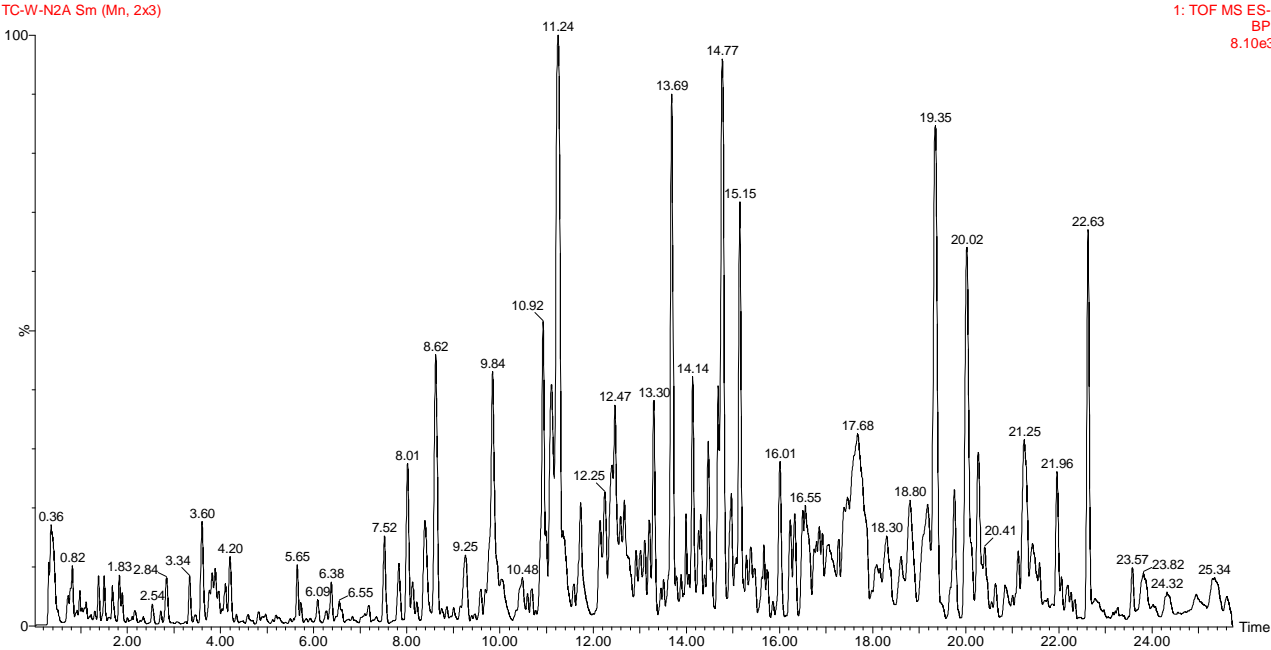

Figure S40. The positive BPI chromatogram of the sample B9

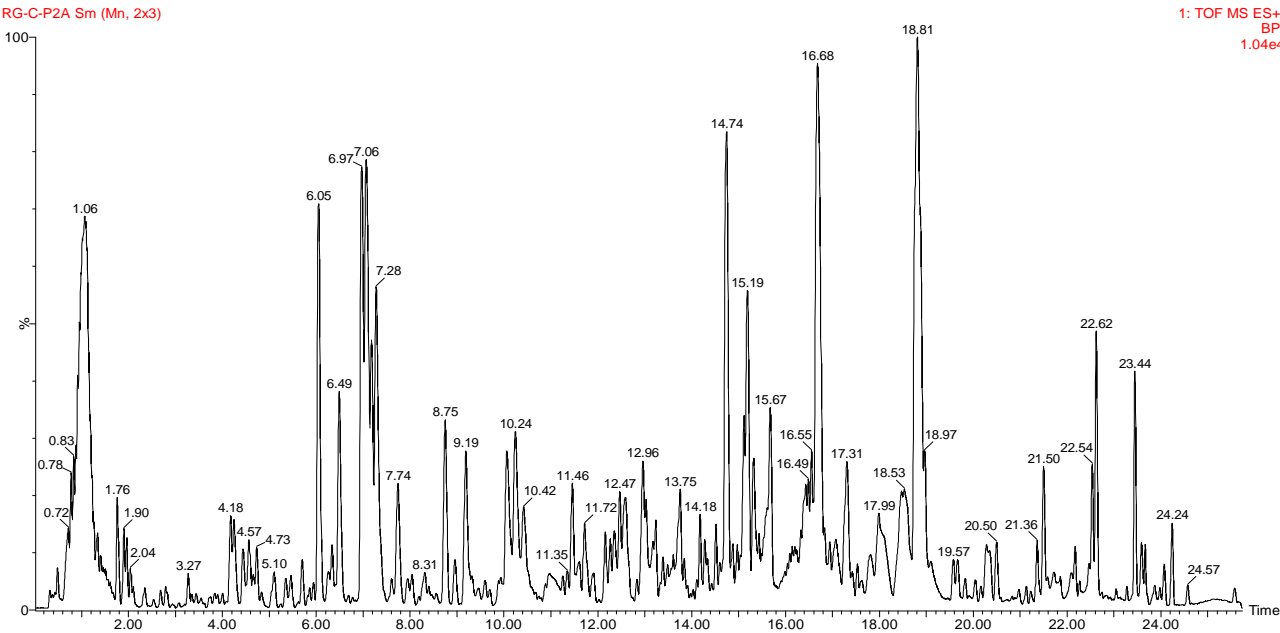

Figure S41. The negative BPI chromatogram of the sample B9

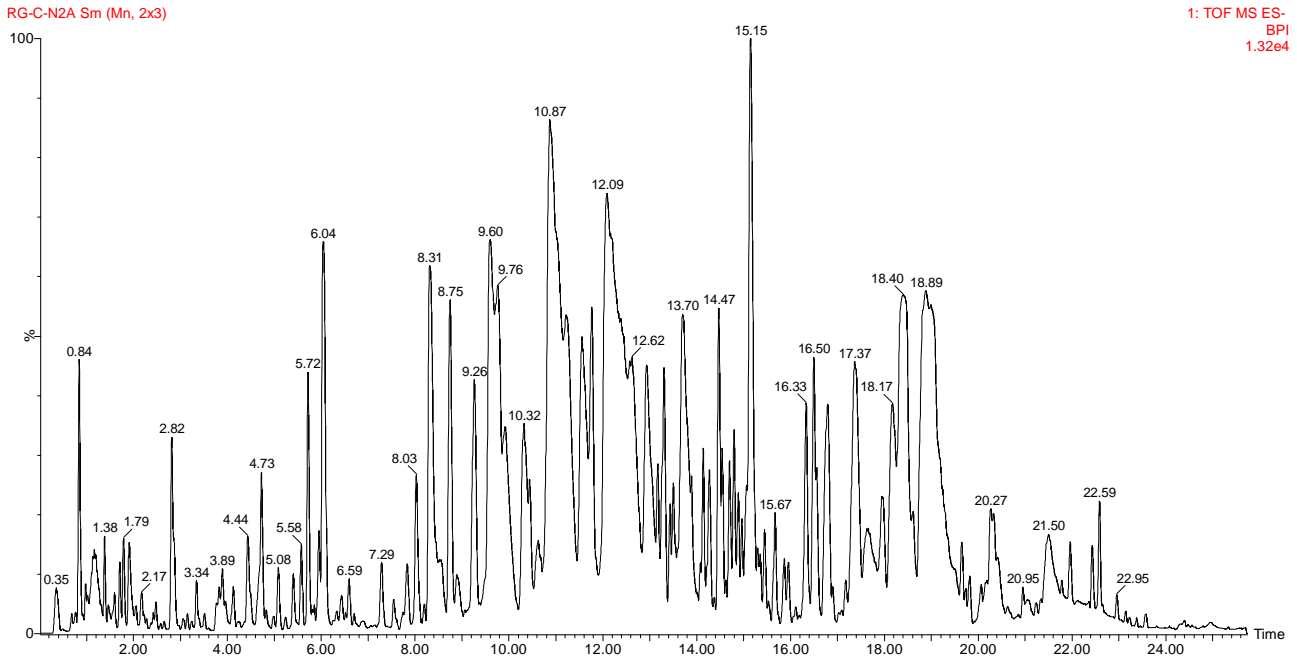

Figure S42. The positive BPI chromatogram of the sample B10

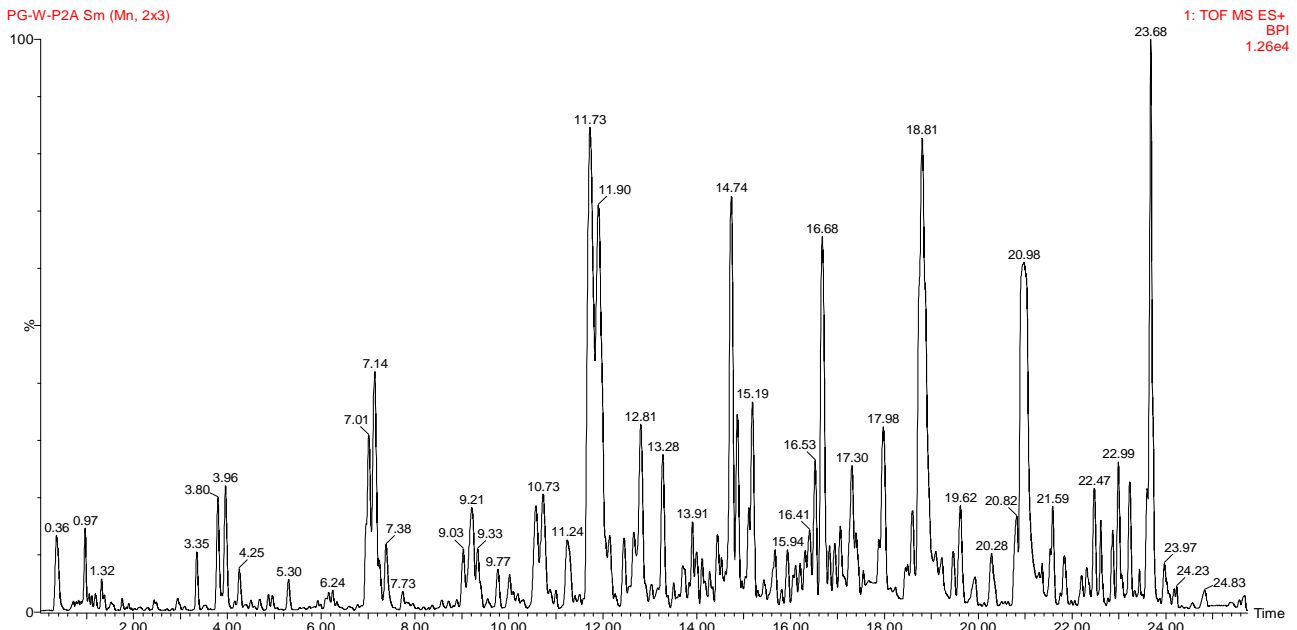

Figure S43. The negative BPI chromatogram of the sample B10

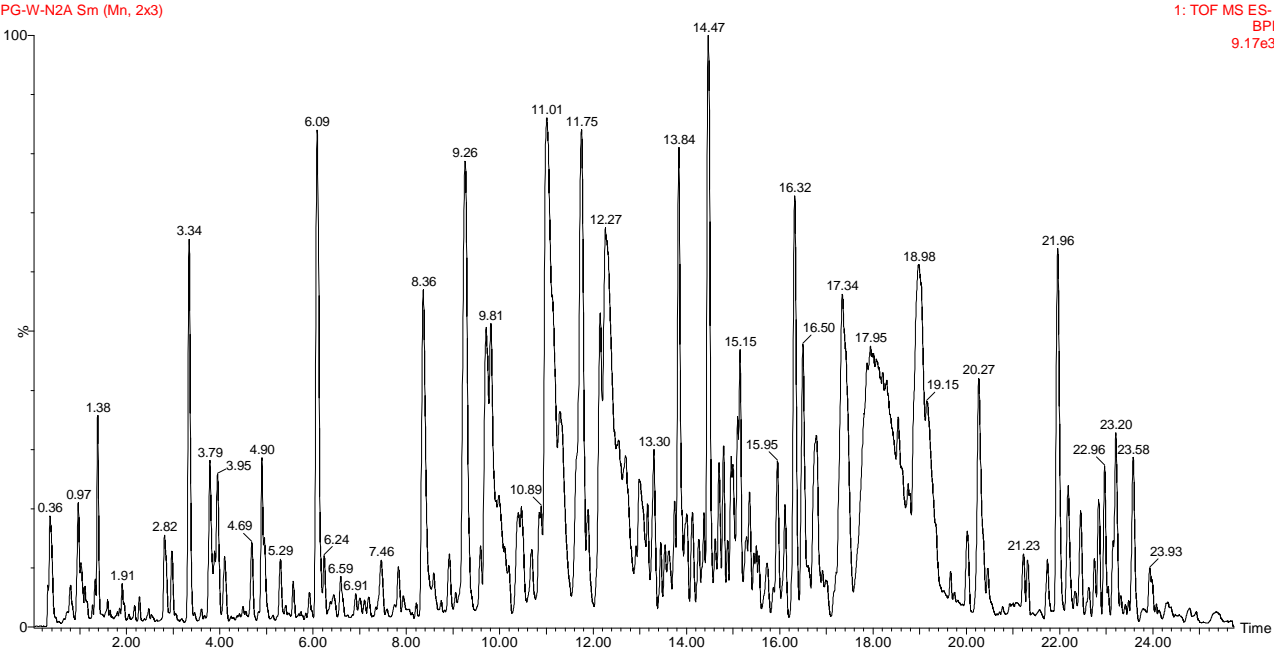

Figure S44. The positive BPI chromatogram of the sample B11

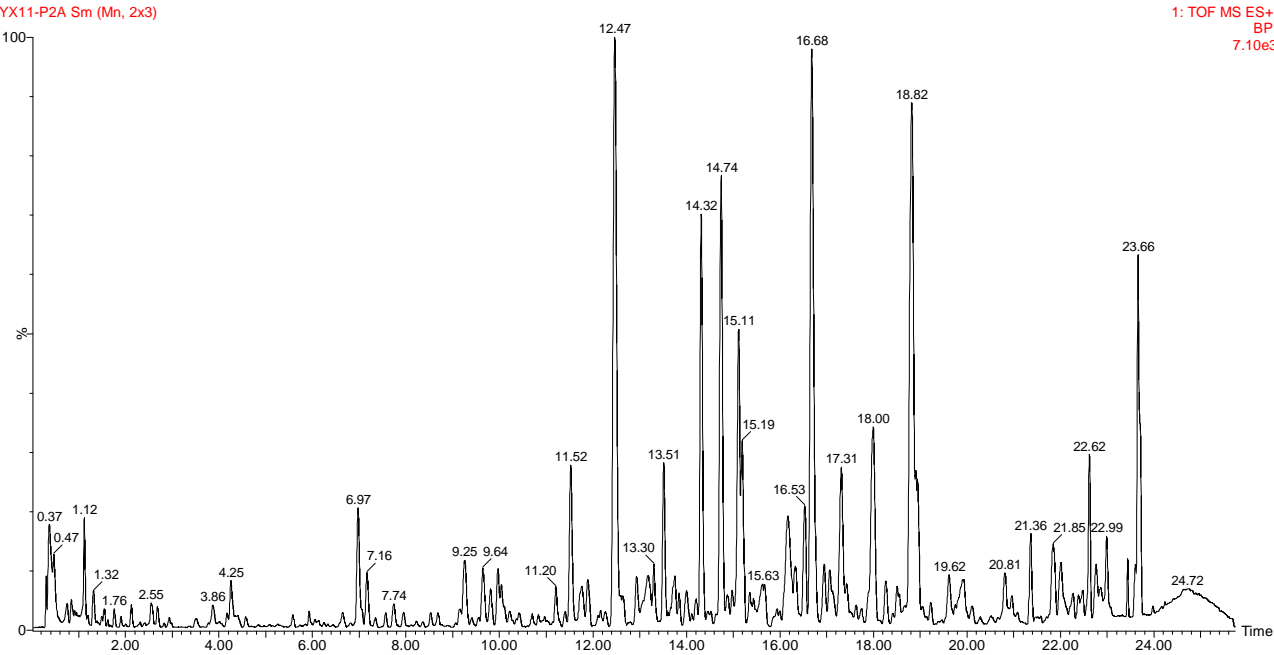



Figure S45. The negative BPI chromatogram of the sample B11

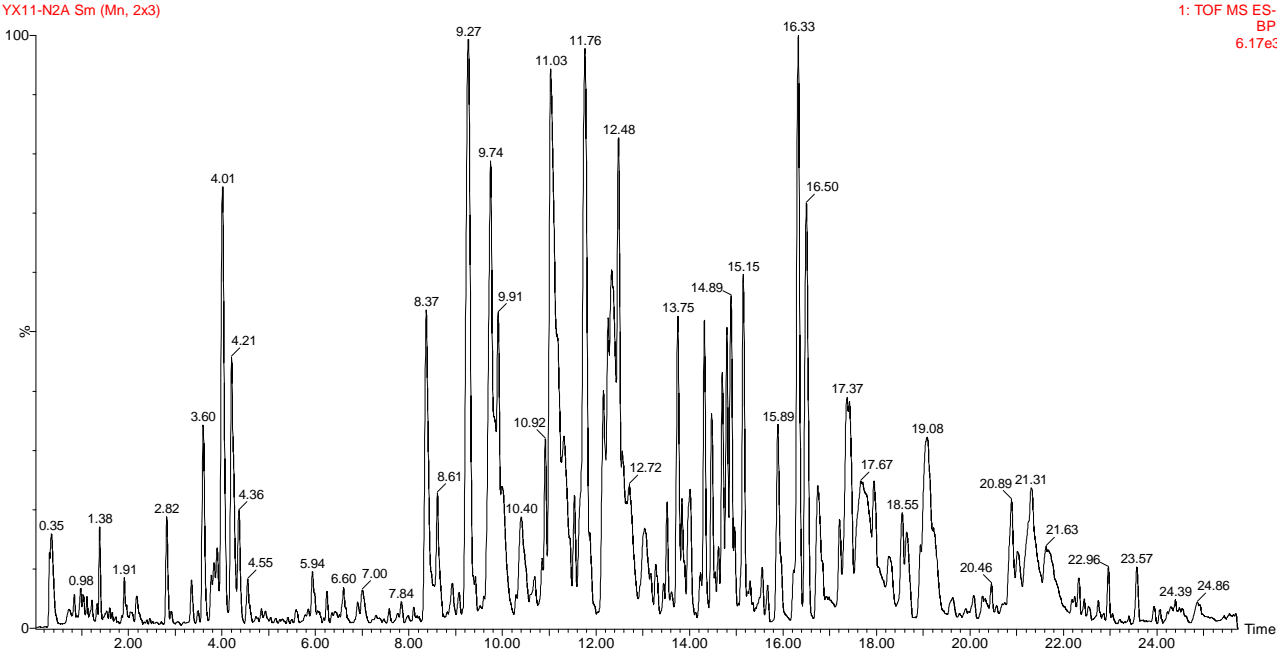

Figure S46. The positive BPI chromatogram of the sample B12

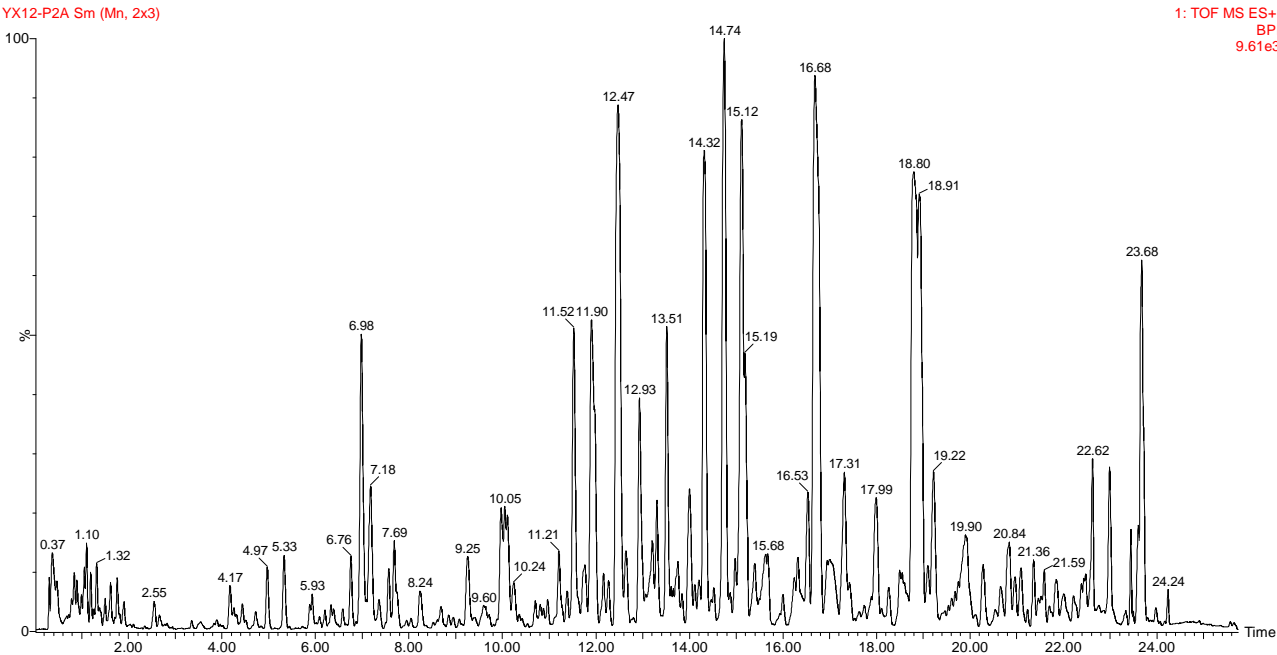

Figure S47. The negative BPI chromatogram of the sample B12

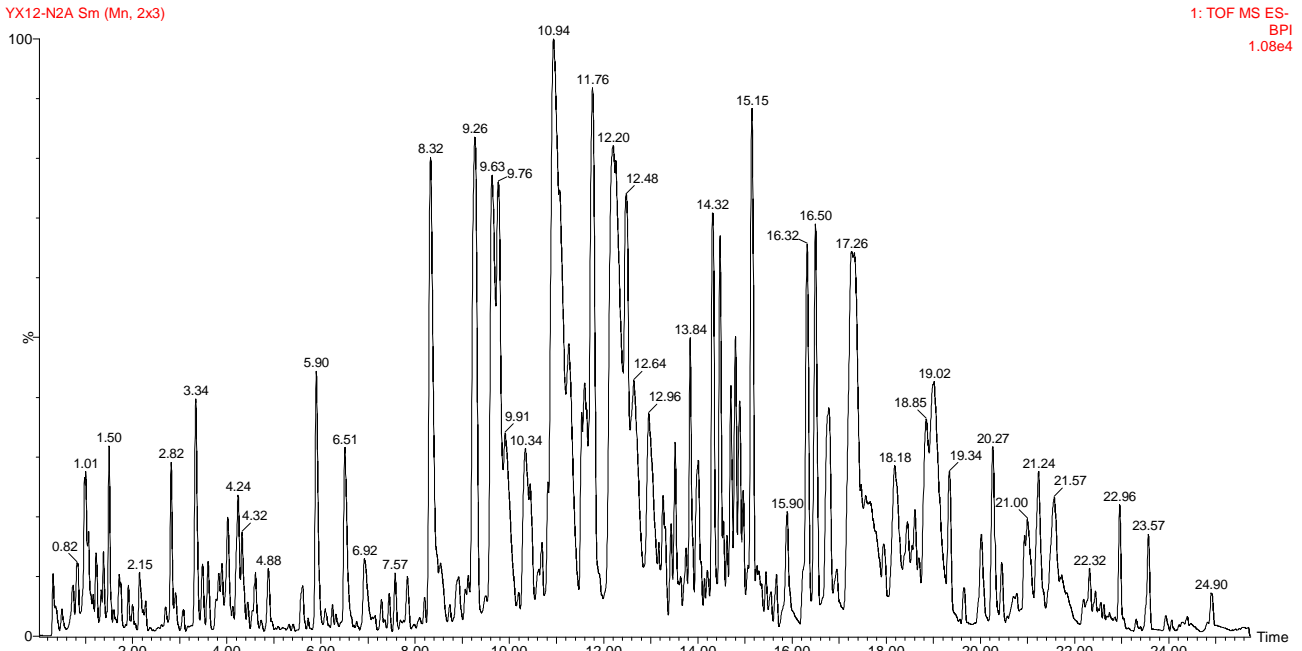

Figure S48. The OPLS-DA score plot in positive ion mode

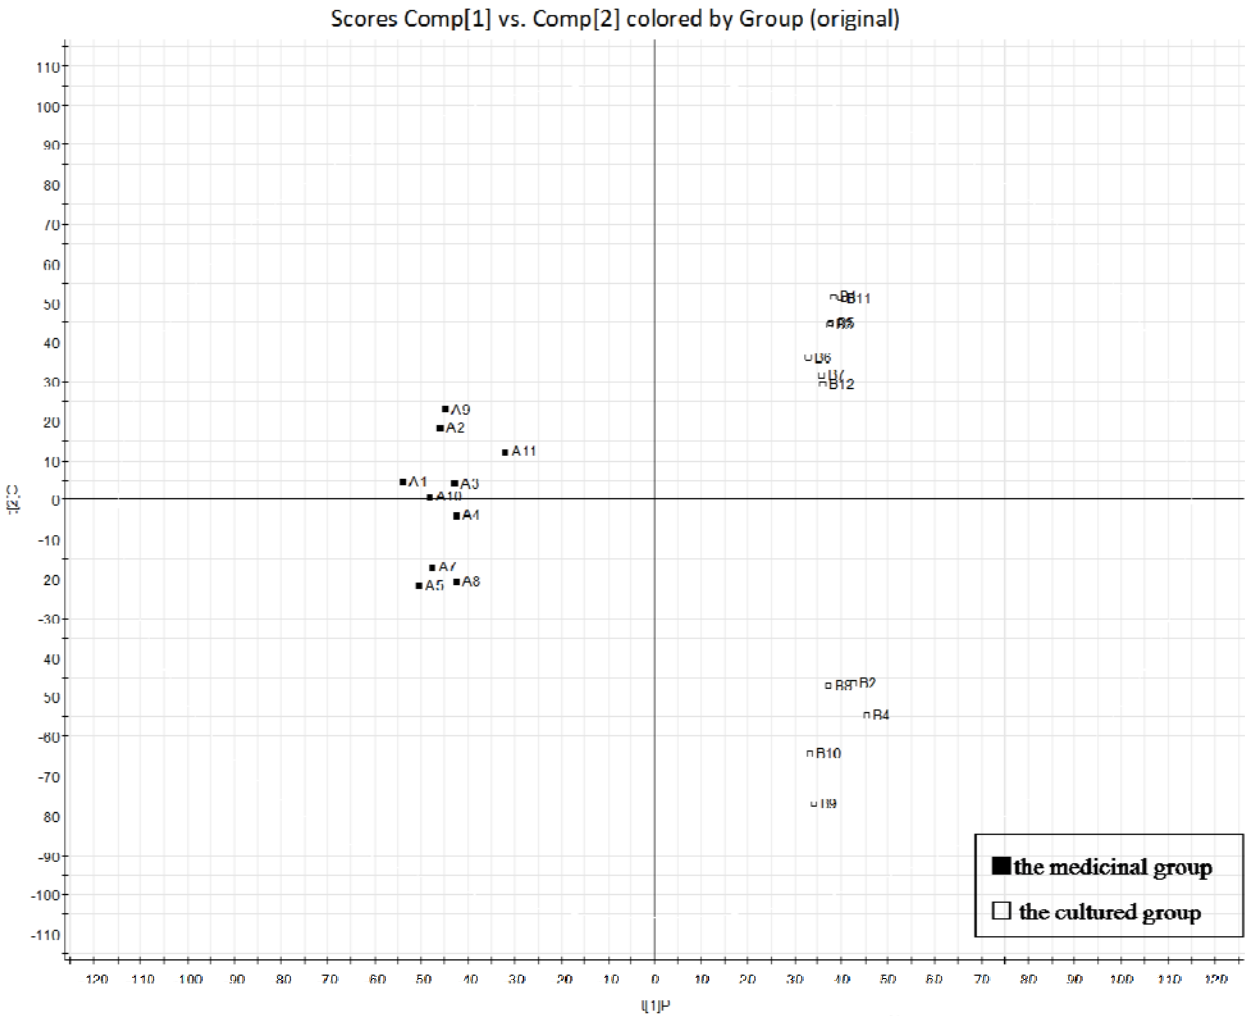

Figure S49. The  $^1\text{H-NMR}$  spectrum of compound **1** in  $\text{DMSO-}d_6$ 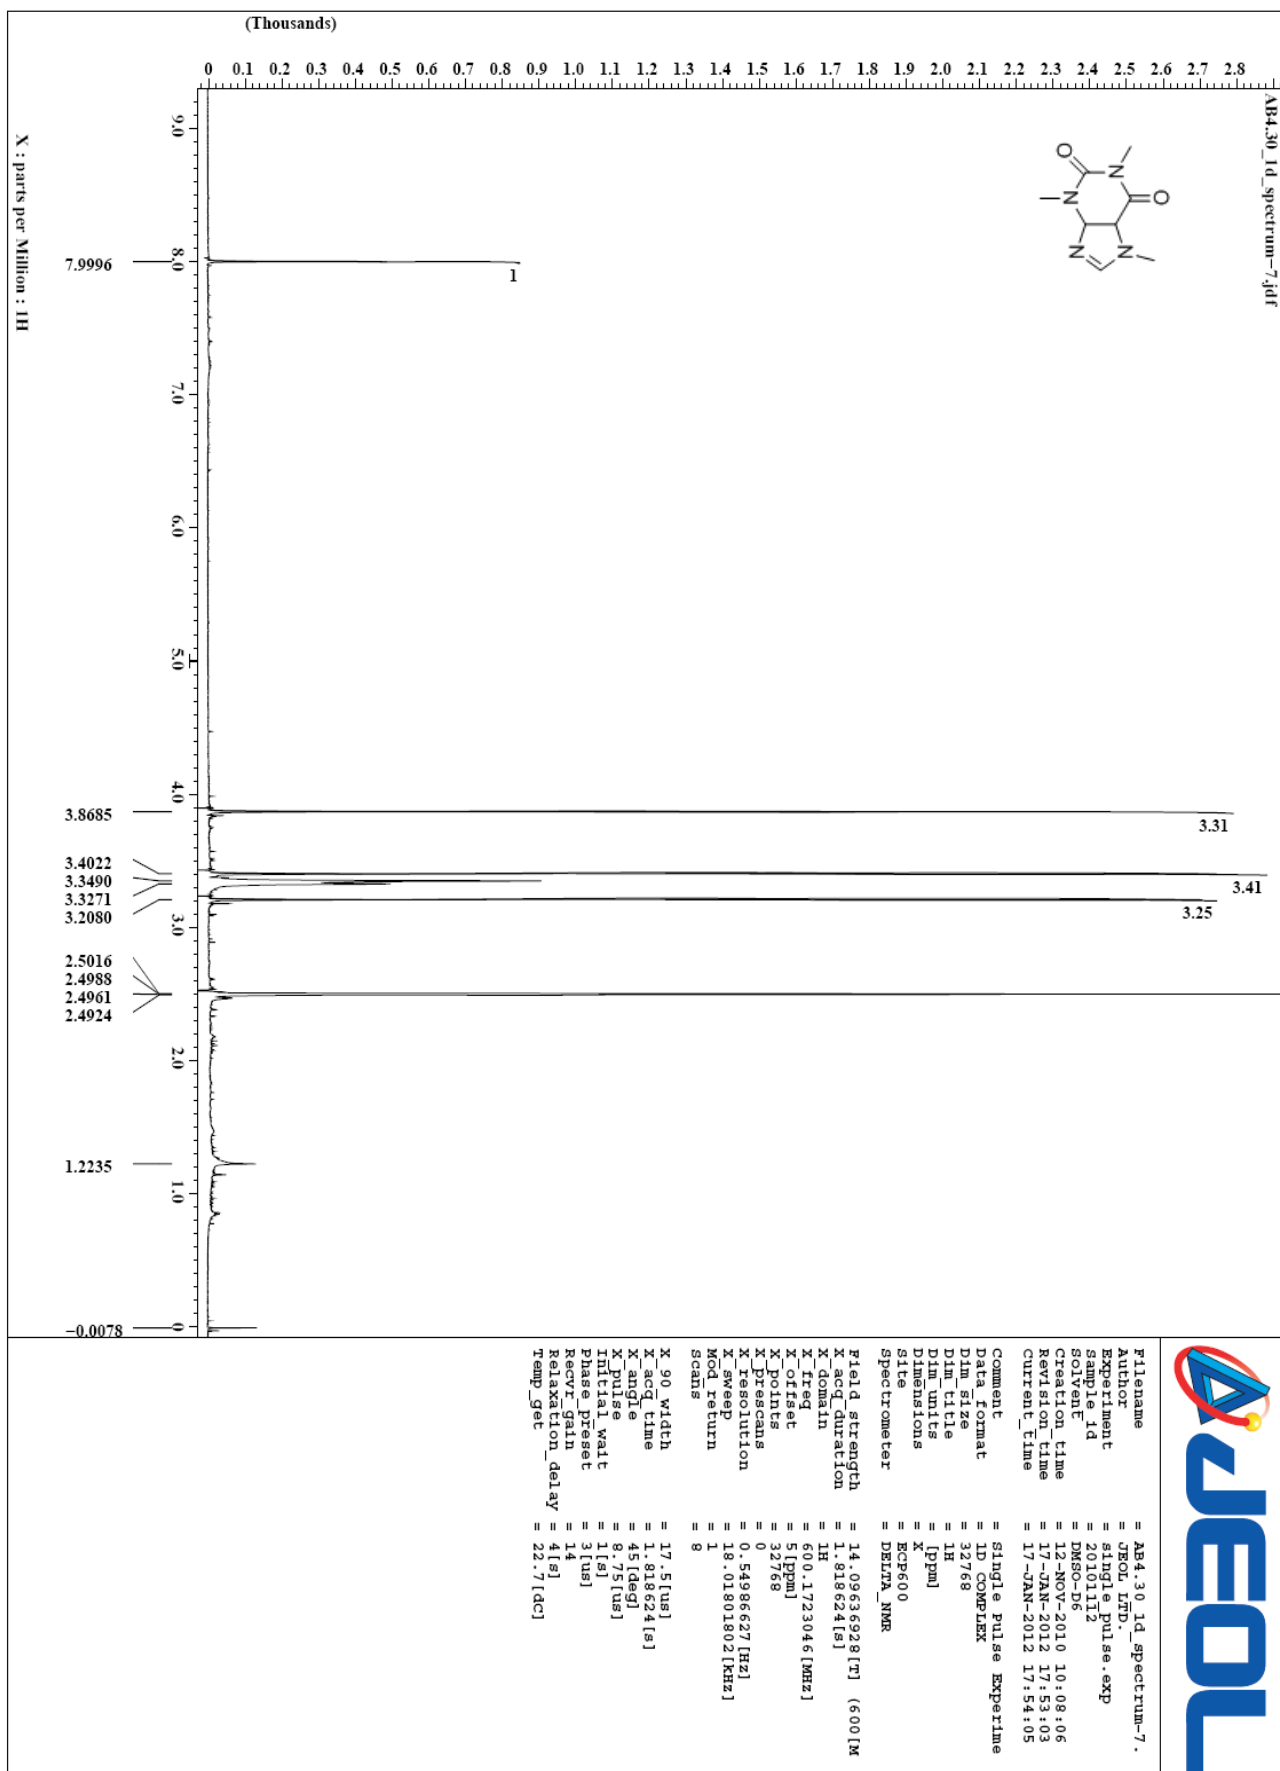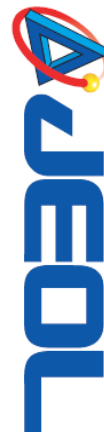

Figure S50. The <sup>13</sup>C-NMR spectrum of compound 1 in DMSO-d<sub>6</sub>

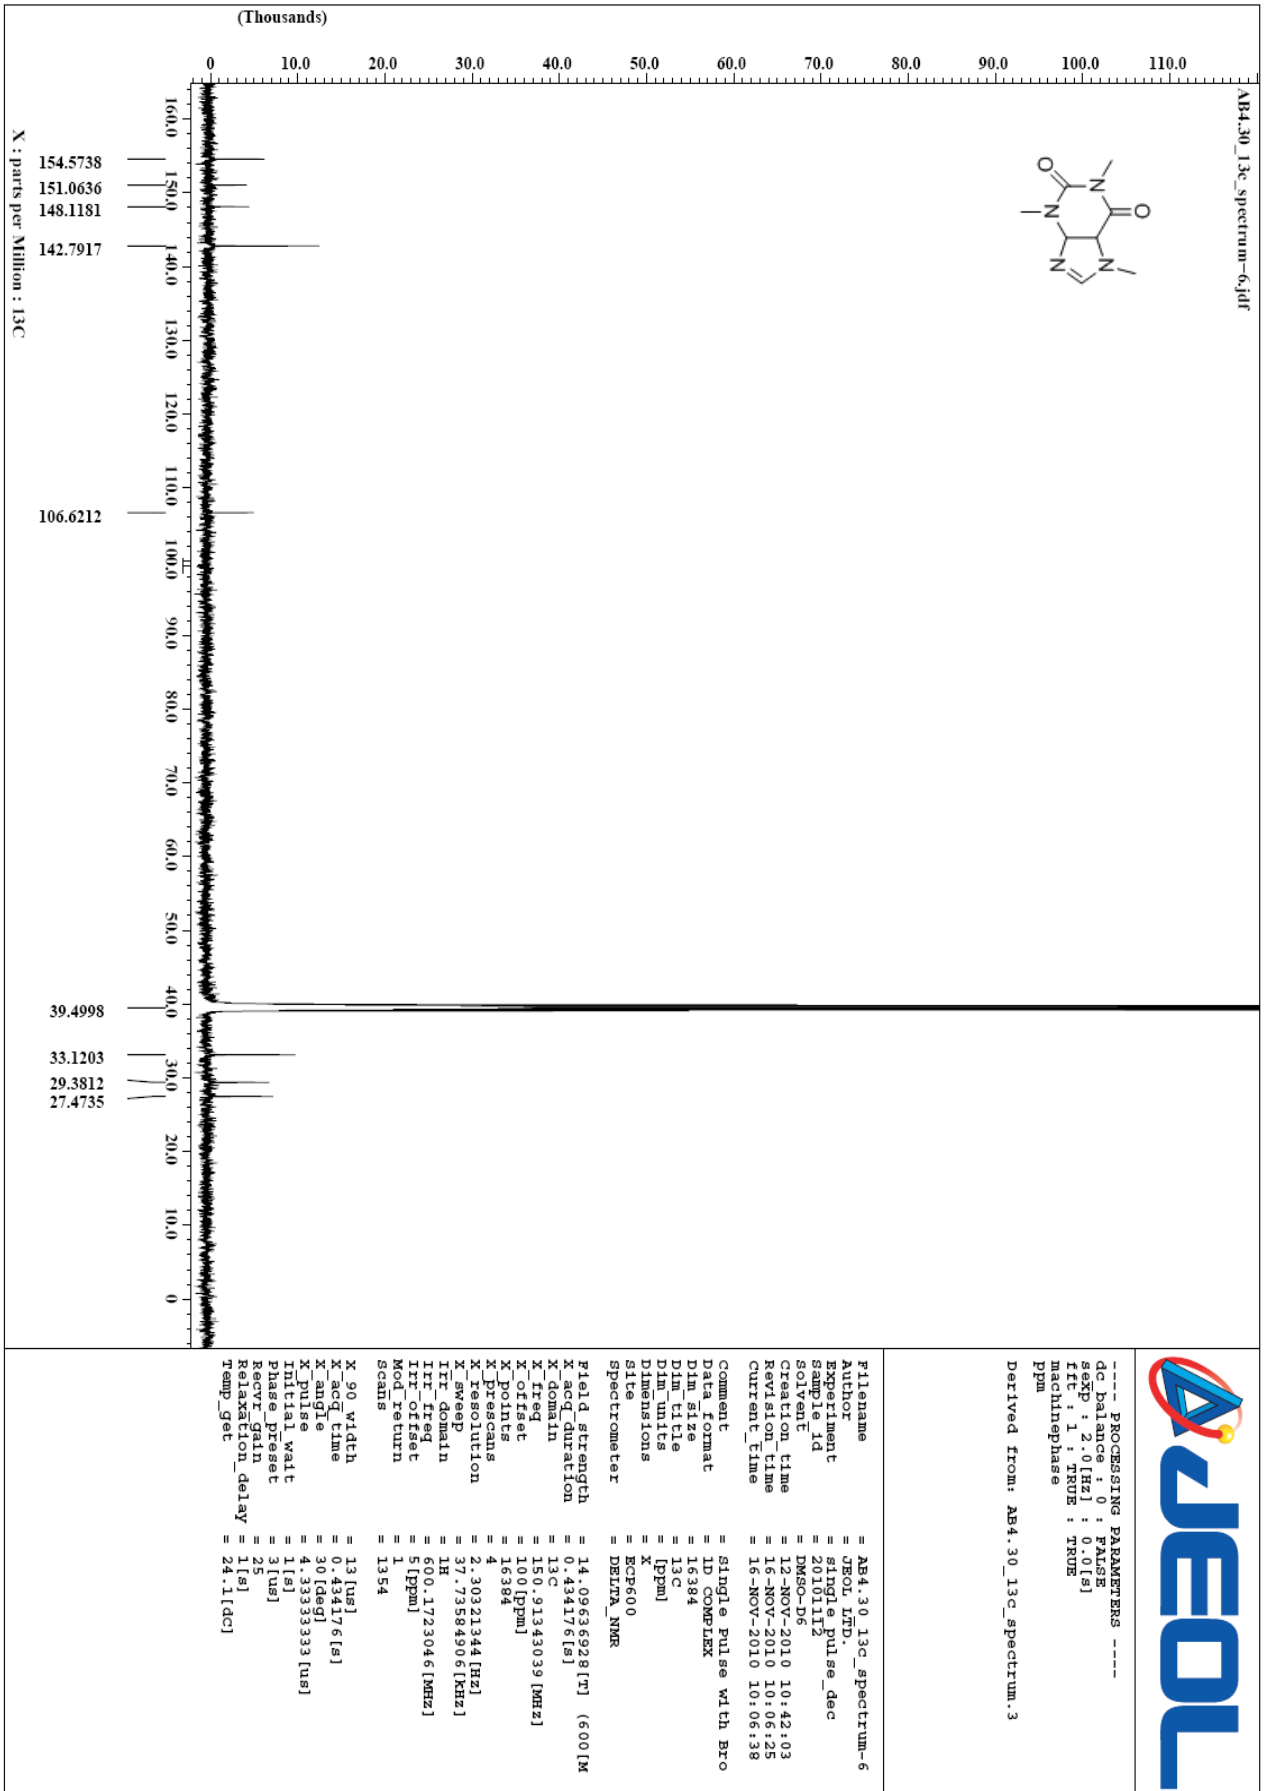

Figure S51. The HMQC spectrum of compound **1** in DMSO-*d*<sub>6</sub>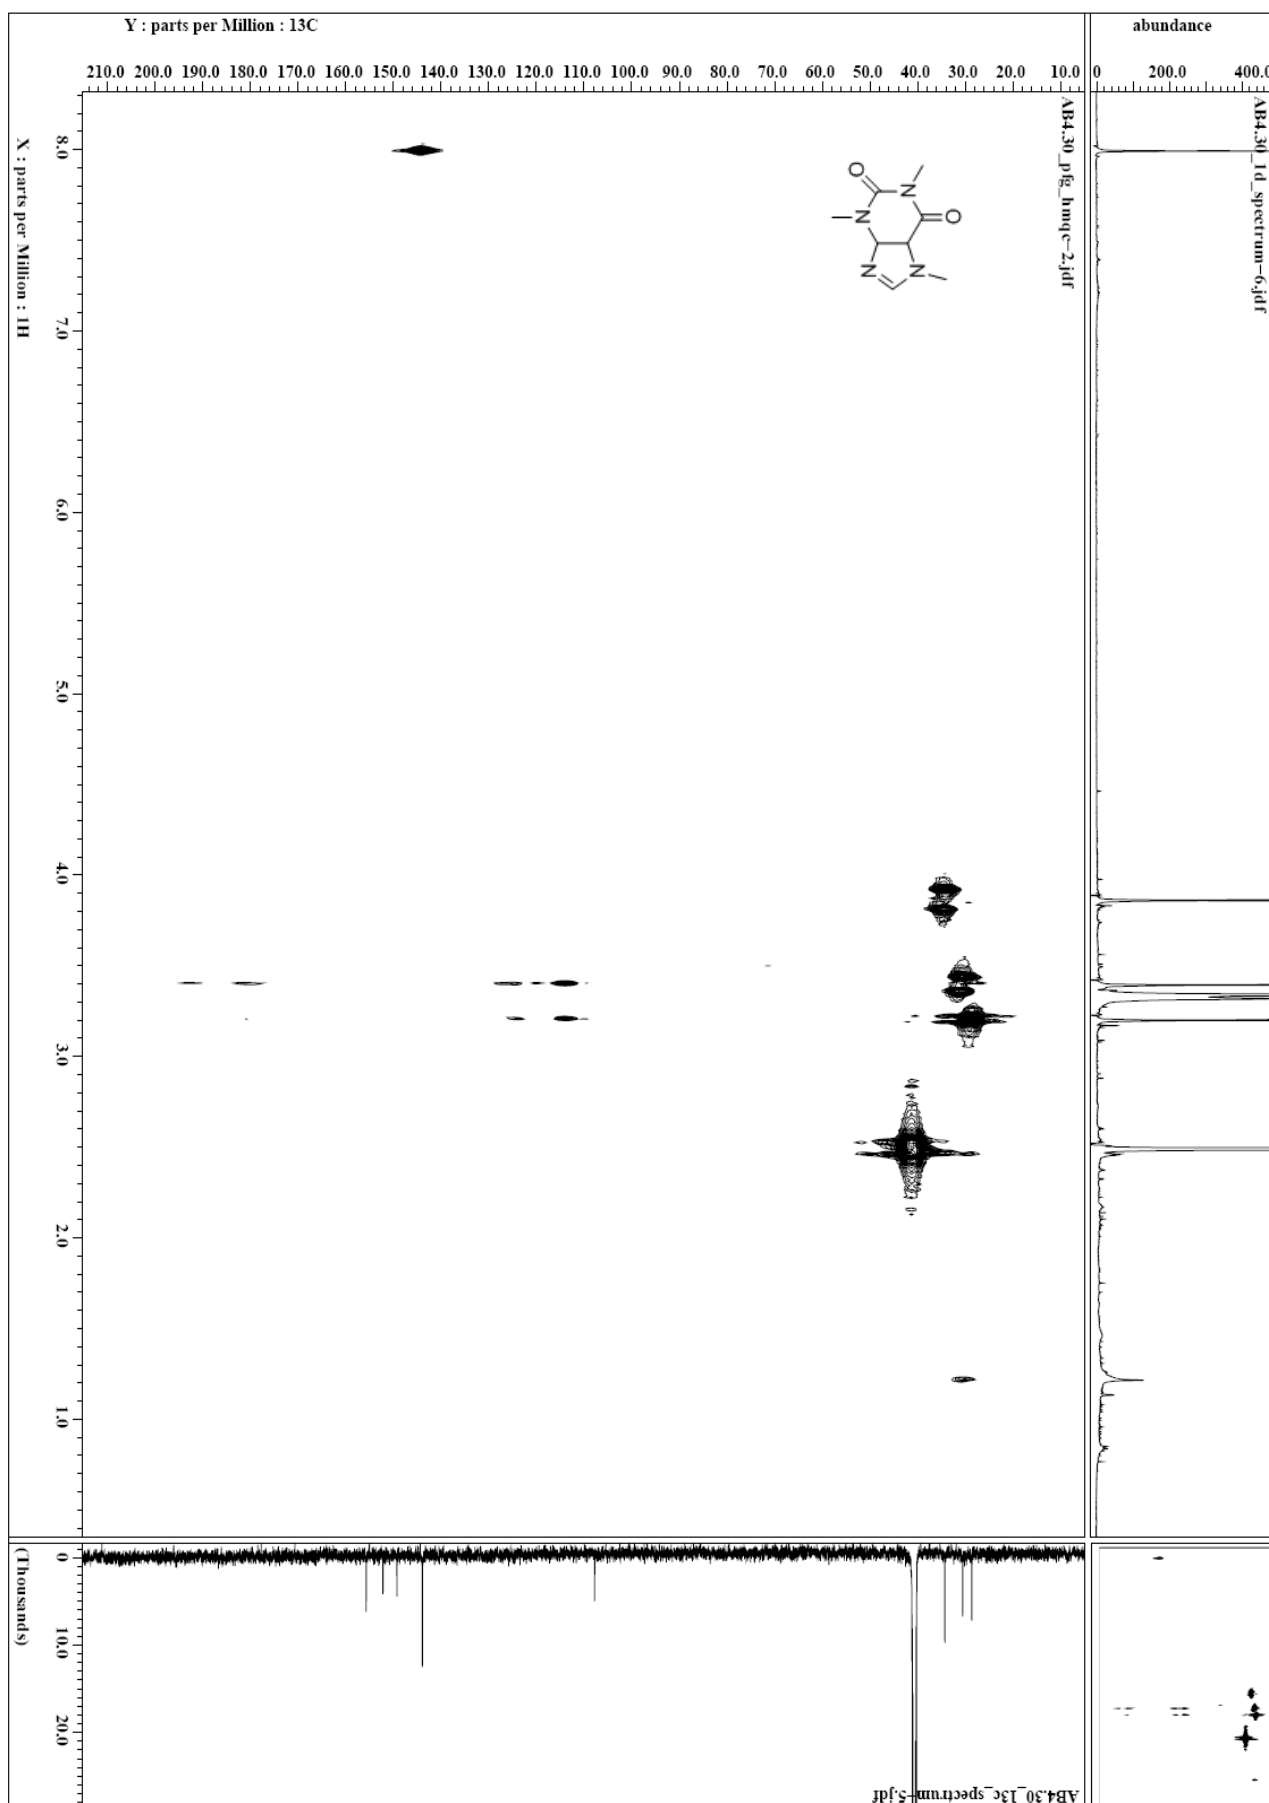

Figure S52. The HMBC spectrum of compound 1 in DMSO-*d*<sub>6</sub>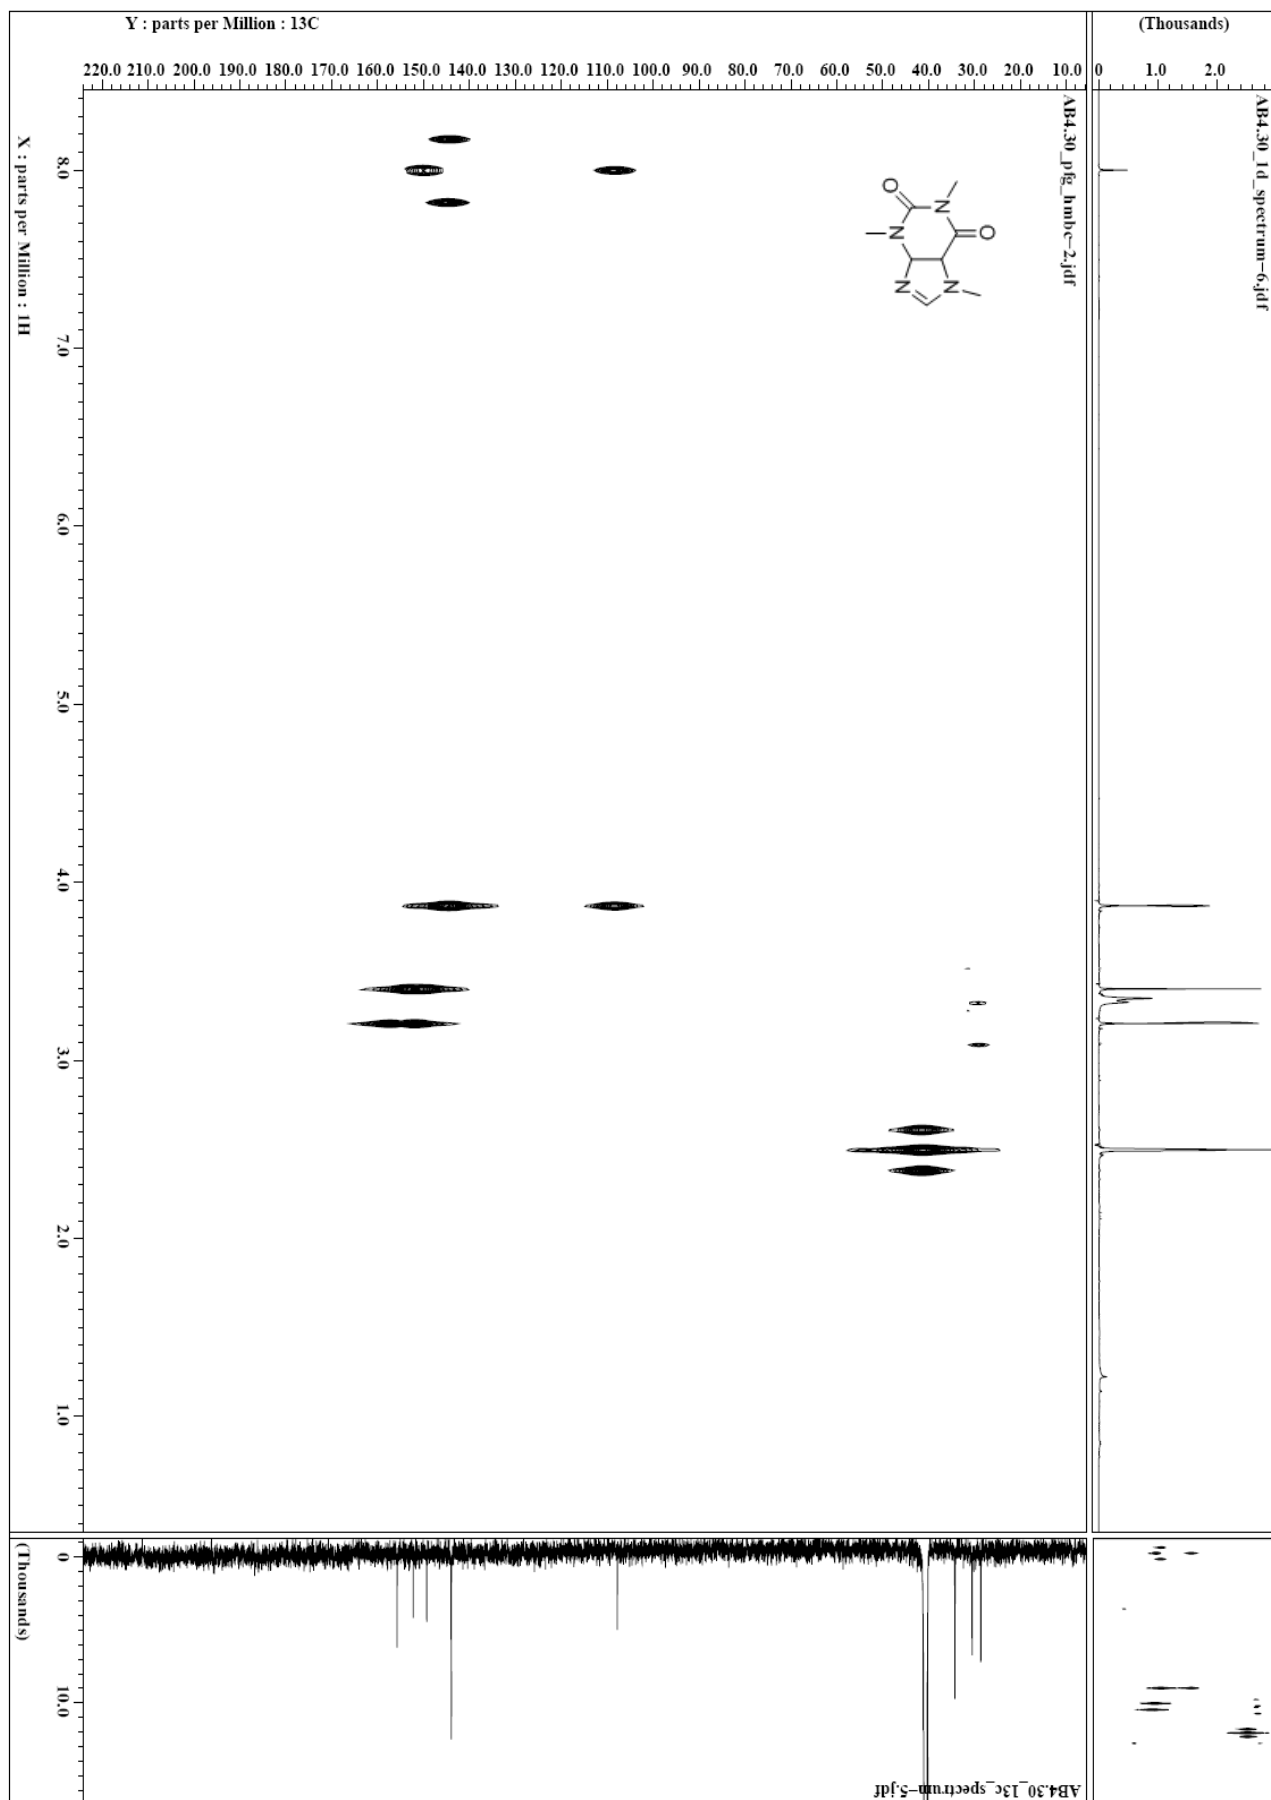

Supplement: marinedrugs-10-01180-s001.pdf [file marinedrugs-10-01180-s001.pdf]
